# Supplementary material
Source: PubMed Central journal article supplement (PMC2708680)
Supplement: 0901942106_0901942106SI.pdf [file 0901942106_0901942106SI.pdf]

# Supporting Information

Miura et al. 10.1073/pnas.0901942106

## SI Text

**Plant Materials and Growth Conditions.** The *Epi-d1* mutant (natural mutant) has been maintained by seeds for >90 years in the plant breeding laboratory of Kyushu University. All nontransgenic plants used in this study were grown under natural field conditions in a research field at Nagoya University, Togo, Aichi, Japan. Seeds were immersed in water for 2 days and sown in a nursery bed. One-month-old seedlings were transplanted to the paddy field with a spacing of 20 × 35 cm. Transgenic plants were grown in a closed greenhouse.

**Primer Sequences Used in This Article.** d1-1002-U: 5'-AAAAA-GTAATTCCAATCACAATCCGAA-3', d1-1002-L: 5'-CC-TCTCCTGATGATGCAGTG-3', d1-1005-U: 5'-GTTGAGT-AACCACGTCTTTCGACGTCTGC-3', d1-1005-L: 5'-GTG-AAATGGTATTGTTGGAAGAC-3', STS-1-U: 5'-TATGCC-AAGTACAATCTAATAAC-3', STS-1-L: 5'-TTTCCGACG-AGGAGTATTCC-3', STS-2-U: 5'-TGACACCGGCATAAA-AGACG-3', STS-2-L: 5'-TCGGGAGGATGTTTGCATCC-3', d1-8-U: 5'-CCACTATGCACATGTATGATATGA-3', d1-8-L: 5'-TCGCCTCTTGACGAAAGCG-3', d1-17-U: 5'-TTAGTGTGGAGCGCGTGTTTAAATGCGG-3',

d1-17-L: 5'-ATTAGGTCCGGCATAAAAA-3', D1-exon9-10U: 5'-TATGAGTCATTTTGCAGGAGG-3', D1-exon9-10L: 5'-ATTGTACTTACTCGCTAATGGC-3', d1-11-U: 5'-AAACAGGAGATATACTAAAACTAACTC-GG-3', d1-11-L: 5'-AAATTTGACACTAGATCGA-3', d1-12-U: 5'-GATGTCTCATTGCAAGTTTG-3', and d1-12-L: 5'-TTAATTTACCTCTTATACTTAGGGAGACT-3'. Repeat-probe-U: 5'-GTTTGTTCGAGAAGCACCAG-3', repeat-probe-L: 5'-GATTGAGGATTTCACAACCGG-3', *D1*-probe-U: 5'-TATGAGTCATTTTGCAGGAGG-3', *D1*-probe-L: 5'-ATTGTACTTACTCGCTAATGGC-3', 5s-rRNA-probe-U: 5'-GGATTAGGCTCACCAACCA-3', 5s-rRNA-probe-L: 5'-TTATCCAAACGGCAGCTTCT-3', centromere-specific repeat probe-U: 5'-GAGTGTATTGGGTGCGTTTCG-3', centromere-specific repeat probe-L: 5'-GTGAGTTTTTC-CCACGAACG-3', D1-Chip-1-U: 5'-TATGTATAACAATGT-GGGTCAGC-3', D1-Chip-1-L: 5'-TGCATACATGAGCAGT-AAGC-3', D1-Chip-2-U: 5'-AAAAGTAAGTTAGCACTCG-GAC-3', D1-Chip-2-L: 5'-GTCTGCAGACTGTTACCAGC-3', D1-Chip-3-U: 5'-CTGTGCATATGAACATGTCTTG-3', D1-Chip-3-L: 5'-CGAGCACAGTCTACAAGGTC-3', D1-Chip-4-U: 5'-TTTACACGTGGACCATTGATTG-3', D1-Chip-4-L: 5'-TAGACAACAGGTAGAGAATCTG-3'.

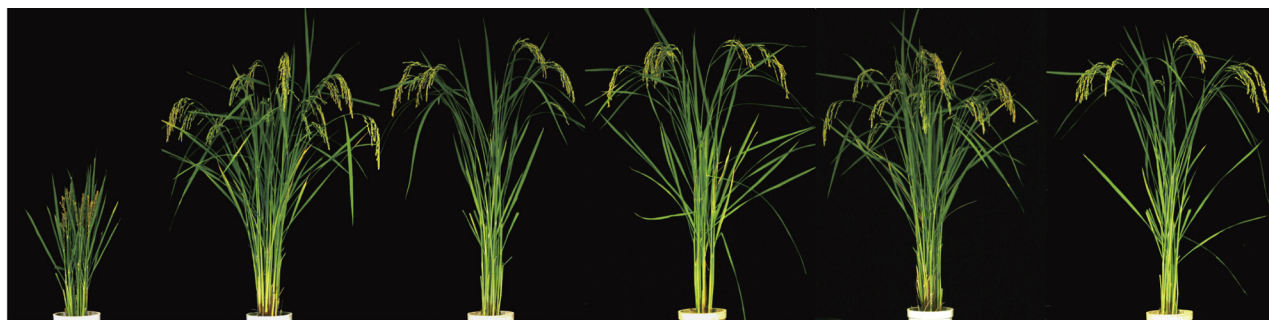

Empty vector    Nipponbare *D1*    *Epi-dwarf* *D1*    *Epi-normal* *D1*    Nipponbare *D1*    *Epi-dwarf* 33.5kb  
in *d1* background    in *d1* background    in *d1* background    in *d1* background    in *Epi-dwarf* background    in *d1* background

**Fig. S1.** Transgenic analysis of the *D1* gene. The gross morphology of transformants. The empty vector and *D1* genes cloned from Nipponbare and *Epi-d1* were transformed into *d1* loss-of-function mutant. The *D1* gene cloned from Nipponbare was also transformed into *Epi-dwarf*. The 33.5-kb candidate region cloned from *Epi-d1* was transformed into *d1* loss-of-function mutant.

|                    |      |                                                                                                          |      |
|--------------------|------|----------------------------------------------------------------------------------------------------------|------|
| Nipponbare-repeata | 1    | -----AAGTTCAGCTCAAGCCCAAGTASAGTCAACGGTGCAGGTTATGAAACAGCAAGCCCACTAAGCCCAATAGTCTAACCTTAA                   | 88   |
| Epi-d1-repeata     | 1    | -----AAGTTCAGCTCAAGCCCAAGTASAGTCAACGGTGCAGGTTATGAAACAGCAAGCCCACTAAGCCCAATAGTCTAACCTTAA                   | 88   |
| Nipponbare-repeatB | 1    | CAGCATATATGATATGTTAGGATTGGTAAGGATGATATACACGATTACAAATTACCAACTCCAACTCGAAGATAATAAGCCCAATAGTCTAACCTTAA       | 100  |
| Epi-d1-repeatB     | 1    | CAGCATATATGATATGTTAGGATTGGTAAGGATGATATACACGATTACAAATTACCAACTCCAACTCGAAGATAATAAGCCCAATAGTCTAACCTTAA       | 100  |
| Nipponbare-repeatC | 1    | CAGCATATATGATATGTTAGGATTGGTAAGGATGATATACACGATTACAAATTACCAACTCCAACTCGAAGATAATAAGCCCAATAGTCTAACCTTAA       | 100  |
| Epi-d1-repeatC     | 1    | CAGCATATATGATATGTTAGGATTGGTAAGGATGATATACACGATTACAAATTACCAACTCCAACTCGAAGATAATAAGCCCAATAGTCTAACCTTAA       | 100  |
| Nipponbare-repeata | 89   | ATCCCTCCCTACCTGTCCTCTCTTTCTCAACGATTCCAGAGAGCCGCTTATCTCTGAGCCGAGTGGCCGACAGCGCCGCCAGGAGTCGAGGAGTC          | 188  |
| Epi-d1-repeata     | 89   | ATCCCTCCCTACCTGTCCTCTCTTTCTCAACGATTCCAGAGAGCCGCTTATCTCTGAGCCGAGTGGCCGACAGCGCCGCCAGGAGTCGAGGAGTC          | 188  |
| Nipponbare-repeatB | 101  | ATCCCTCCCTACCTGTCCTCTCTTTCTCAACGATTCCAGAGAGCCGCTTATCTCTGAGCCGAGTGGCCGACAGCGCCGCCAGGAGTCGAGGAGTC          | 200  |
| Epi-d1-repeatB     | 101  | ATCCCTCCCTACCTGTCCTCTCTTTCTCAACGATTCCAGAGAGCCGCTTATCTCTGAGCCGAGTGGCCGACAGCGCCGCCAGGAGTCGAGGAGTC          | 200  |
| Nipponbare-repeatC | 101  | ATCCCTCCCTACCTGTCCTCTCTTTCTCAACGATTCCAGAGAGCCGCTTATCTCTGAGCCGAGTGGCCGACAGCGCCGCCAGGAGTCGAGGAGTC          | 200  |
| Epi-d1-repeatC     | 101  | ATCCCTCCCTACCTGTCCTCTCTTTCTCAACGATTCCAGAGAGCCGCTTATCTCTGAGCCGAGTGGCCGACAGCGCCGCCAGGAGTCGAGGAGTC          | 200  |
| Nipponbare-repeata | 189  | ATAGTCTGTAGCGCCACCTTCTCTTCTGTCGCGCGGTTGTGCGCTTTCTGCGCGCGGTTCTCCCGCTTCACTCTGATCTCTCAAGCTCAACAGCTGCCAT     | 288  |
| Epi-d1-repeata     | 189  | ATAGTCTGTAGCGCGCCACCTTCTCTTCTGTCGCGCGGTTGTGCGCTTTCTGCGCGCGGTTCTCCCGCTTCACTCTGATCTCTCAAGCTCAACAGCTGCCAT   | 288  |
| Nipponbare-repeatB | 201  | ATAGTCTGTAGCGCGCCACCTTCTCTTCTGTCGCGCGGTTGTGCGCTTTCTGCGCGCGGTTCTCCCGCTTCACTCTGATCTCTCAAGCTCAACAGCTGCCAT   | 300  |
| Epi-d1-repeatB     | 201  | ATAGTCTGTAGCGCGCGCCACCTTCTCTTCTGTCGCGCGGTTGTGCGCTTTCTGCGCGCGGTTCTCCCGCTTCACTCTGATCTCTCAAGCTCAACAGCTGCCAT | 300  |
| Nipponbare-repeatC | 201  | ATAGTCTGTAGCGCGCGCCACCTTCTCTTCTGTCGCGCGGTTGTGCGCTTTCTGCGCGCGGTTCTCCCGCTTCACTCTGATCTCTCAAGCTCAACAGCTGCCAT | 300  |
| Epi-d1-repeatC     | 201  | ATAGTCTGTAGCGCGCGCCACCTTCTCTTCTGTCGCGCGGTTGTGCGCTTTCTGCGCGCGGTTCTCCCGCTTCACTCTGATCTCTCAAGCTCAACAGCTGCCAT | 300  |
| Nipponbare-repeata | 289  | CGCTCTCTACGCTGGCTATCGGGAAGGTCAAGTATGACGCGCTCTCTTCTCTACTTGGCTCGGCGACCTTAAGACCCCACTCGCTCTTCTCTCG           | 388  |
| Epi-d1-repeata     | 289  | CGCTCTCTACGCTGGCTATCGGGAAGGTCAAGTATGACGCGCTCTCTTCTCTACTTGGCTCGGCGACCTTAAGACCCCACTCGCTCTTCTCTCG           | 388  |
| Nipponbare-repeatB | 301  | CGCTCTCTACGCTGGCTATCGGGAAGGTCAAGTATGACGCGCTCTCTTCTCTACTTGGCTCGGCGACCTTAAGACCCCACTCGCTCTTCTCTCG           | 400  |
| Epi-d1-repeatB     | 301  | CGCTCTCTACGCTGGCTATCGGGAAGGTCAAGTATGACGCGCTCTCTTCTCTACTTGGCTCGGCGACCTTAAGACCCCACTCGCTCTTCTCTCG           | 400  |
| Nipponbare-repeatC | 301  | CGCTCTCTACGCTGGCTATCGGGAAGGTCAAGTATGACGCGCTCTCTTCTCTACTTGGCTCGGCGACCTTAAGACCCCACTCGCTCTTCTCTCG           | 400  |
| Epi-d1-repeatC     | 301  | CGCTCTCTACGCTGGCTATCGGGAAGGTCAAGTATGACGCGCTCTCTTCTCTACTTGGCTCGGCGACCTTAAGACCCCACTCGCTCTTCTCTCG           | 400  |
| Nipponbare-repeata | 389  | CGAATCGCTAGTATACCGCGCGGCGACACCCCTACTCCGCTGTGGCGCGGCTCTGCTCTGCTTGTCTGCTCTTCTTGTGCTACAGAGCAAA              | 488  |
| Epi-d1-repeata     | 389  | CGAATCGCTAGTATACCGCGCGGCGACACCCCTACTCCGCTGTGGCGCGGCTCTGCTCTGCTTGTCTGCTCTTCTTGTGCTACAGAGCAAA              | 488  |
| Nipponbare-repeatB | 401  | CGAATCGCTAGTATACCGCGCGGCGACACCCCTACTCCGCTGTGGCGCGGCTCTGCTCTGCTTGTCTGCTCTTCTTGTGCTACAGAGCAAA              | 500  |
| Epi-d1-repeatB     | 401  | CGAATCGCTAGTATACCGCGCGGCGACACCCCTACTCCGCTGTGGCGCGGCTCTGCTCTGCTTGTCTGCTCTTCTTGTGCTACAGAGCAAA              | 500  |
| Nipponbare-repeatC | 401  | CGAATCGCTAGTATACCGCGCGGCGACACCCCTACTCCGCTGTGGCGCGGCTCTGCTCTGCTTGTCTGCTCTTCTTGTGCTACAGAGCAAA              | 500  |
| Epi-d1-repeatC     | 401  | CGAATCGCTAGTATACCGCGCGGCGACACCCCTACTCCGCTGTGGCGCGGCTCTGCTCTGCTTGTCTGCTCTTCTTGTGCTACAGAGCAAA              | 500  |
| Nipponbare-repeata | 489  | CGAGCCCACTGAGCTAGACAAGTACGCGAGCTAGCTGGTCTTCTAGCTCGTTAGGTAATAGCCGAGATAGCTAGACCGAGCTGGCTCGA                | 588  |
| Epi-d1-repeata     | 489  | CGAGCCCACTGAGCTAGACAAGTACGCGAGCTAGCTGGTCTTCTAGCTCGTTAGGTAATAGCCGAGATAGCTAGACCGAGCTGGCTCGA                | 588  |
| Nipponbare-repeatB | 501  | CGAGCCCACTGAGCTAGACAAGTACGCGAGCTAGCTGGTCTTCTAGCTCGTTAGGTAATAGCCGAGCTAGCTAGACCGAGCTGGCTCGA                | 600  |
| Epi-d1-repeatB     | 501  | CGAGCCCACTGAGCTAGACAAGTACGCGAGCTAGCTGGTCTTCTAGCTCGTTAGGTAATAGCCGAGCTAGCTAGACCGAGCTGGCTCGA                | 600  |
| Nipponbare-repeatC | 501  | CGAGCCCACTGAGCTAGACAAGTACGCGAGCTAGCTGGTCTTCTAGCTCGTTAGGTAATAGCCGAGCTAGCTAGACCGAGCTGGCTCGA                | 600  |
| Epi-d1-repeatC     | 501  | CGAGCCCACTGAGCTAGACAAGTACGCGAGCTAGCTGGTCTTCTAGCTCGTTAGGTAATAGCCGAGCTAGCTAGACCGAGCTGGCTCGA                | 600  |
| Nipponbare-repeata | 589  | CATCAACCGCTACAGCGGTGTCTTTCGCCAATCTTATCTCTCGGAGGCTCACTTCTCTCCCGAGTGGCTGCGAGACCTCTCAAGCTCGAGAGAG           | 686  |
| Epi-d1-repeata     | 589  | CATCAACCGCTACAGCGGTGTCTTTCGCCAATCTTATCTCTCGGAGGCTCACTTCTCTCCCGAGTGGCTGCGAGACCTCTCAAGCTCGAGAGAG           | 686  |
| Nipponbare-repeatB | 601  | CATCAACCGCTACAGCGGTGTCTTTCGCCAATCTTATCTCTCGGAGGCTCACTTCTCTCCCGAGTGGCTGCGAGACCTCTCAAGCTCGAGAGAG           | 700  |
| Epi-d1-repeatB     | 601  | CATCAACCGCTACAGCGGTGTCTTTCGCCAATCTTATCTCTCGGAGGCTCACTTCTCTCCCGAGTGGCTGCGAGACCTCTCAAGCTCGAGAGAG           | 700  |
| Nipponbare-repeatC | 601  | CATCAACCGCTACAGCGGTGTCTTTCGCCAATCTTATCTCTCGGAGGCTCACTTCTCTCCCGAGTGGCTGCGAGACCTCTCAAGCTCGAGAGAG           | 700  |
| Epi-d1-repeatC     | 601  | CATCAACCGCTACAGCGGTGTCTTTCGCCAATCTTATCTCTCGGAGGCTCACTTCTCTCCCGAGTGGCTGCGAGACCTCTCAAGCTCGAGAGAG           | 700  |
| Nipponbare-repeata | 687  | GTGCACTTCTTCTCTCTCTCTCCATCCCAATCTCTCCCTCTCTTCCCGTGTCCGCTGTCCAGCTCTCCCGCAACAACTCCAGCTCTACTTTC             | 786  |
| Epi-d1-repeata     | 687  | GTGCACTTCTTCTCTCTCTCTCCATCCCAATCTCTCCCTCTCTTCCCGTGTCCGCTGTCCAGCTCTCCCGCAACAACTCCAGCTCTACTTTC             | 786  |
| Nipponbare-repeatB | 701  | GTGCACTTCTTCTCTCTCTCTCCATCCCAATCTCTCCCTCTCTTCCCGTGTCCGCTGTCCAGCTCTCCCGCAACAACTCCAGCTCTACTTTC             | 800  |
| Epi-d1-repeatB     | 701  | GTGCACTTCTTCTCTCTCTCTCCATCCCAATCTCTCCCTCTCTTCCCGTGTCCGCTGTCCAGCTCTCCCGCAACAACTCCAGCTCTACTTTC             | 800  |
| Nipponbare-repeatC | 701  | GTGCACTTCTTCTCTCTCTCTCCATCCCAATCTCTCCCTCTCTTCCCGTGTCCGCTGTCCAGCTCTCCCGCAACAACTCCAGCTCTACTTTC             | 800  |
| Epi-d1-repeatC     | 701  | GTGCACTTCTTCTCTCTCTCTCCATCCCAATCTCTCCCTCTCTTCCCGTGTCCGCTGTCCAGCTCTCCCGCAACAACTCCAGCTCTACTTTC             | 800  |
| Nipponbare-repeata | 787  | CGCGCCCGCCCTCTCCGCTGGTACGCGCGAGCGCGCTGCGCGCGCGCTTCTTGGCCCTATGCGCGAGTCTTCTCAAGAGCTTTTGTCTGAT              | 886  |
| Epi-d1-repeata     | 787  | CGCGCCCGCCCTCTCCGCTGGTACGCGCGAGCGCGCTGCGCGCGCGCTTCTTGGCCCTATGCGCGAGTCTTCTCAAGAGCTTTTGTCTGAT              | 886  |
| Nipponbare-repeatB | 801  | CGCGCCCGCCCTCTCCGCTGGTACGCGCGAGCGCGCTGCGCGCGCGCTTCTTGGCCCTATGCGCGAGTCTTCTCAAGAGCTTTTGTCTGAT              | 900  |
| Epi-d1-repeatB     | 801  | CGCGCCCGCCCTCTCCGCTGGTACGCGCGAGCGCGCTGCGCGCGCGCTTCTTGGCCCTATGCGCGAGTCTTCTCAAGAGCTTTTGTCTGAT              | 900  |
| Nipponbare-repeatC | 801  | CGCGCCCGCCCTCTCCGCTGGTACGCGCGAGCGCGCTGCGCGCGCGCTTCTTGGCCCTATGCGCGAGTCTTCTCAAGAGCTTTTGTCTGAT              | 900  |
| Epi-d1-repeatC     | 801  | CGCGCCCGCCCTCTCCGCTGGTACGCGCGAGCGCGCTGCGCGCGCGCTTCTTGGCCCTATGCGCGAGTCTTCTCAAGAGCTTTTGTCTGAT              | 900  |
| Nipponbare-repeata | 887  | TTGCTGAGCGCGGTAGGATTATATATTTTGTGGTGGTAAATTCGCGAGCAAAAAGAAAAAATAAATACCGAATGTTATAAACCGAGCATCT              | 985  |
| Epi-d1-repeata     | 887  | TTGCTGAGCGCGGTAGGATTATATATTTTGTGGTGGTAAATTCGCGAGCAAAAAGAAAAAATAAATACCGAATGTTATAAACCGAGCATCT              | 986  |
| Nipponbare-repeatB | 901  | TTGCTGAGCGCGGTAGGATTATATATTTTGTGGTGGTAAATTCGCGAGCAAAAAGAAAAAATAAATACCGAATGTTATAAACCGAGCATCT              | 999  |
| Epi-d1-repeatB     | 901  | TTGCTGAGCGCGGTAGGATTATATATTTTGTGGTGGTAAATTCGCGAGCAAAAAGAAAAAATAAATACCGAATGTTATAAACCGAGCATCT              | 999  |
| Nipponbare-repeatC | 901  | TTGCTGAGCGCGGTAGGATTATATATTTTGTGGTGGTAAATTCGCGAGCAAAAAGAAAAAATAAATACCGAATGTTATAAACCGAGCATCT              | 999  |
| Epi-d1-repeatC     | 901  | TTGCTGAGCGCGGTAGGATTATATATTTTGTGGTGGTAAATTCGCGAGCAAAAAGAAAAAATAAATACCGAATGTTATAAACCGAGCATCT              | 999  |
| Nipponbare-repeata | 986  | CATGGTGTCCATGTATCAGCATATATGATATGTTAGGATCGGTAAAGGATGATAGCACAGGATTAACCAACCACTCCACCTCGAAGATAATATAGCT        | 1085 |
| Epi-d1-repeata     | 987  | CATGGTGTCCATGTATCAGCATATATGATATGTTAGGATCGGTAAAGGATGATAGCACAGGATTAACCAACCACTCCACCTCGAAGATAATATAGCT        | 1086 |
| Nipponbare-repeatB | 1000 | CATGGTGTCCATGTATCAGCATATATGATATGTTAGGATCGGTAAAGGATGATAGCACAGGATTAACCAACCACTCCACCTCGAAGATAATATAGCT        | 1099 |
| Epi-d1-repeatB     | 1000 | CATGGTGTCCATGTATCAGCATATATGATATGTTAGGATCGGTAAAGGATGATAGCACAGGATTAACCAACCACTCCACCTCGAAGATAATATAGCT        | 1099 |
| Nipponbare-repeatC | 1000 | CATGGTGTCCATGTATCAGCATATATGATATGTTAGGATCGGTAAAGGATGATAGCACAGGATTAACCAACCACTCCACCTCGAAGATAATATAGCT        | 1099 |
| Epi-d1-repeatC     | 1000 | CATGGTGTCCATGTATCAGCATATATGATATGTTAGGATCGGTAAAGGATGATAGCACAGGATTAACCAACCACTCCACCTCGAAGATAATATAGCT        | 1099 |
| Nipponbare-repeata | 1086 | AGTGTGTTGCCAGCTTCGACGTTATGGCCGAATCTTATGTATAACAAATTTACCATGGTATGTAAGCTCAAAAATGCAAAAATAATATCTCGAACT         | 1185 |
| Epi-d1-repeata     | 1087 | AGTGTGTTGCCAGCTTCGACGTTATGGCCGAATCTTATGTATAACAAATTTACCATGGTATGTAAGCTCAAAAATGCAAAAATAATATCTCGAACT         | 1186 |
| Nipponbare-repeatB | 1100 | AGTGTGTTGCCAGCTTCGACGTTATGGCCGAATCTTATGTATAACAAATTTACCATGGTATGTAAGCTCAAAAATGCAAAAATAATATCTCGAACT         | 1199 |
| Epi-d1-repeatB     | 1100 | AGTGTGTTGCCAGCTTCGACGTTATGGCCGAATCTTATGTATAACAAATTTACCATGGTATGTAAGCTCAAAAATGCAAAAATAATATCTCGAACT         | 1199 |
| Nipponbare-repeatC | 1100 | AGTGTGTTGCCAGCTTCGACGTTATGGCCGAATCTTATGTATAACAAATTTACCATGGTATGTAAGCTCAAAAATGCAAAAATAATATCTCGAACT         | 1199 |
| Epi-d1-repeatC     | 1100 | AGTGTGTTGCCAGCTTCGACGTTATGGCCGAATCTTATGTATAACAAATTTACCATGGTATGTAAGCTCAAAAATGCAAAAATAATATCTCGAACT         | 1199 |
| Nipponbare-repeata | 1186 | AAAAAAGTGTATACATGCAAGAGATGATCAATCCCATATATAATACATGCAAAATAATACAGCCCTGCTCGACAGCCATGCTGACGCTGTACTAAGC        | 1285 |
| Epi-d1-repeata     | 1187 | AAAAAAGTGTATACATGCAAGAGATGATCAATCCCATATATAATACATGCAAAATAATACAGCCCTGCTCGACAGCCATGCTGACGCTGTACTAAGC        | 1286 |
| Nipponbare-repeatB | 1200 | AAAAAAGTGTATACATGCAAGAGATGATCAATCCCATATATAATACATGCAAAATAATACAGCCCTGCTCGACAGCCATGCTGACGCTGTACTAAGC        | 1299 |
| Epi-d1-repeatB     | 1200 | AAAAAAGTGTATACATGCAAGAGATGATCAATCCCATATATAATACATGCAAAATAATACAGCCCTGCTCGACAGCCATGCTGACGCTGTACTAAGC        | 1299 |
| Nipponbare-repeatC | 1200 | AAAAAAGTGTATACATGCAAGAGATGATCAATCCCATATATAATACATGCAAAATAATACAGCCCTGCTCGACAGCCATGCTGACGCTGTACTAAGC        | 1299 |
| Epi-d1-repeatC     | 1200 | AAAAAAGTGTATACATGCAAGAGATGATCAATCCCATATATAATACATGCAAAATAATACAGCCCTGCTCGACAGCCATGCTGACGCTGTACTAAGC        | 1299 |
| Nipponbare-repeata | 1286 | TACTAGCTGTGGCGCGGTGTGATCCACCAACCGTASCAATGGCTGTCTGACAGGCGCATGATCTCTGAAAAAGTCTCTGCAAGCAATATATATAT          | 1385 |
| Epi-d1-repeata     | 1287 | TACTAGCTGTGGCGCGGTGTGATCCACCAACCGTASCAATGGCTGTCTGACAGGCGCATGATCTCTGAAAAAGTCTCTGCAAGCAATATATATAT          | 1386 |
| Nipponbare-repeatB | 1300 | TACTAGCTGTGGCGCGGTGTGATCCACCAACCGTASCAATGGCTGTCTGACAGGCGCATGATCTCTGAAAAAGTCTCTGCAAGCAATATATATAT          | 1399 |
| Epi-d1-repeatB     | 1300 | TACTAGCTGTGGCGCGGTGTGATCCACCAACCGTASCAATGGCTGTCTGACAGGCGCATGATCTCTGAAAAAGTCTCTGCAAGCAATATATATAT          | 1399 |
| Nipponbare-repeatC | 1300 | TACTAGCTGTGGCGCGGTGTGATCCACCAACCGTASCAATGGCTGTCTGACAGGCGCATGATCTCTGAAAAAGTCTCTGCAAGCAATATATATAT          | 1399 |
| Epi-d1-repeatC     | 1300 | TACTAGCTGTGGCGCGGTGTGATCCACCAACCGTASCAATGGCTGTCTGACAGGCGCATGATCTCTGAAAAAGTCTCTGCAAGCAATATATATAT          | 1399 |

Fig. S2. Comparison of upstream repeat sequences. Comparison of repeat A, B, C between Nipponbare and *Epi-dl*.

|                    |      |                                                                                                        |      |
|--------------------|------|--------------------------------------------------------------------------------------------------------|------|
| Nipponbare-repeatA | 1386 | ACAGTTGTACACACCCCTC8CCCCATTATCCCTCTTAAAGGAGTAAGGAGTAATGACAGTCGATATGTGTGGTTGATTAATAATTTAGAGAGAACGTTT    | 1485 |
| Epi-d1-repeatA     | 1387 | ACAGTTGTACACACCCCTC8CCCCATTATCCCTCTTAAAGGAGTAAGGAGTAATGACAGTCGATATGTGTGGTTGATTAATAATTTAGAGAGAACGTTT    | 1486 |
| Nipponbare-repeatB | 1400 | ACAGTTGTACACACCCCTC8CCCCATTATCCCTCTTAAAGGAGTAAGGAGTAATGACAGTCGATATGTGTGGTTGATTAATAATTTAGAGAGAACGTTT    | 1499 |
| Epi-d1-repeatB     | 1400 | ACAGTTGTACACACCCCTC8CCCCATTATCCCTCTTAAAGGAGTAAGGAGTAATGACAGTCGATATGTGTGGTTGATTAATAATTTAGAGAGAACGTTT    | 1499 |
| Nipponbare-repeatC | 1400 | ACAGTTGTACACACCCCTC8CCCCATTATCCCTCTTAAAGGAGTAAGGAGTAATGACAGTCGATATGTGTGGTTGATTAATAATTTAGAGAGAACGTTT    | 1499 |
| Epi-d1-repeatC     | 1400 | ACAGTTGTACACACCCCTC8CCCCATTATCCCTCTTAAAGGAGTAAGGAGTAATGACAGTCGATATGTGTGGTTGATTAATAATTTAGAGAGAACGTTT    | 1499 |
| Nipponbare-repeatA | 1486 | TTGAATAGAAATTGTGAACCTTACTCGAATATCGTCTTTTGTGTATGCTTTTGTATGCTTCACTGACTATCTCTGTGAAATGGCAGCTAGTATATT       | 1585 |
| Epi-d1-repeatA     | 1487 | TTGAATAGAAATTGTGAACCTTACTCGAATATCGTCTTTTGTGTATGCTTTTGTATGCTTCACTGACTATCTCTGTGAAATGGCAGCTAGTATATT       | 1586 |
| Nipponbare-repeatB | 1500 | TTGAATAGAAATTGTGAACCTTACTCGAATATCGTCTTTTGTGTATGCTTTTGTATGCTTCACTGACTATCTCTGTGAAATGGCAGCTAGTATATT       | 1599 |
| Epi-d1-repeatB     | 1500 | TTGAATAGAAATTGTGAACCTTACTCGAATATCGTCTTTTGTGTATGCTTTTGTATGCTTCACTGACTATCTCTGTGAAATGGCAGCTAGTATATT       | 1599 |
| Nipponbare-repeatC | 1500 | TTGAATAGAAATTGTGAACCTTACTCGAATATCGTCTTTTGTGTATGCTTTTGTATGCTTCACTGACTATCTCTGTGAAATGGCAGCTAGTATATT       | 1599 |
| Epi-d1-repeatC     | 1500 | TTGAATAGAAATTGTGAACCTTACTCGAATATCGTCTTTTGTGTATGCTTTTGTATGCTTCACTGACTATCTCTGTGAAATGGCAGCTAGTATATT       | 1599 |
| Nipponbare-repeatA | 1586 | GAAGGTTGAAGCTTTTGTGGGTATCCAGCAAGTATTTCAATGGCGTGTACAGTTTGGAGGTACCTTGGCCCCCAAACTGGGGAAAAAACCCTCAGCTGTT   | 1685 |
| Epi-d1-repeatA     | 1587 | GAAGGTTGAAGCTTTTGTGGGTATCCAGCAAGTATTTCAATGGCGTGTACAGTTTGGAGGTACCTTGGCCCCCAAACTGGGGAAAAAACCCTCAGCTGTT   | 1686 |
| Nipponbare-repeatB | 1600 | GAAGGTTGAAGCTTTTGTGGGTATCCAGCAAGTATTTCAATGGCGTGTACAGTTTGGAGGTACCTTGGCCCCCAAACTGGGGAAAAAACCCTCAGCTGTT   | 1699 |
| Epi-d1-repeatB     | 1600 | GAAGGTTGAAGCTTTTGTGGGTATCCAGCAAGTATTTCAATGGCGTGTACAGTTTGGAGGTACCTTGGCCCCCAAACTGGGGAAAAAACCCTCAGCTGTT   | 1699 |
| Nipponbare-repeatC | 1600 | GAAGGTTGAAGCTTTTGTGGGTATCCAGCAAGTATTTCAATGGCGTGTACAGTTTGGAGGTACCTTGGCCCCCAAACTGGGGAAAAAACCCTCAGCTGTT   | 1699 |
| Epi-d1-repeatC     | 1600 | GAAGGTTGAAGCTTTTGTGGGTATCCAGCAAGTATTTCAATGGCGTGTACAGTTTGGAGGTACCTTGGCCCCCAAACTGGGGAAAAAACCCTCAGCTGTT   | 1699 |
| Nipponbare-repeatA | 1686 | CCCCAGGTCACTGCACTTACAAGAGTTATTTATGCTGATCCAGAGTTTCTGGTGTGCAAAAATGGGTATGTGAATGTGTTCTGATCAGTGAGATGTACT    | 1785 |
| Epi-d1-repeatA     | 1687 | CCCCAGGTCACTGCACTTACAAGAGTTATTTATGCTGATCCAGAGTTTCTGGTGTGCAAAAATGGGTATGTGAATGTGTTCTGATCAGTGAGATGTACT    | 1786 |
| Nipponbare-repeatB | 1700 | CCCCAGGTCACTGCACTTACAAGAGTTATTTATGCTGATCCAGAGTTTCTGGTGTGCAAAAATGGGTATGTGAATGTGTTCTGATCAGTGAGATGTACT    | 1799 |
| Epi-d1-repeatB     | 1700 | CCCCAGGTCACTGCACTTACAAGAGTTATTTATGCTGATCCAGAGTTTCTGGTGTGCAAAAATGGGTATGTGAATGTGTTCTGATCAGTGAGATGTACT    | 1799 |
| Nipponbare-repeatC | 1700 | CCCCAGGTCACTGCACTTACAAGAGTTATTTATGCTGATCCAGAGTTTCTGGTGTGCAAAAATGGGTATGTGAATGTGTTCTGATCAGTGAGATGTACT    | 1799 |
| Epi-d1-repeatC     | 1700 | CCCCAGGTCACTGCACTTACAAGAGTTATTTATGCTGATCCAGAGTTTCTGGTGTGCAAAAATGGGTATGTGAATGTGTTCTGATCAGTGAGATGTACT    | 1799 |
| Nipponbare-repeatA | 1786 | AGGAATACAAAAAAGGACACATTTGATATTTAAAAAAGGCAAGATTTCTGAGTAAATCGAAGATGATATATCTCTTTTGTGCAAGTGTGAGGACAG       | 1885 |
| Epi-d1-repeatA     | 1787 | AGGAATACAAAAAAGGACACATTTGATATTTAAAAAAGGCAAGATTTCTGAGTAAATCGAAGATGATATATCTCTTTTGTGCAAGTGTGAGGACAG       | 1886 |
| Nipponbare-repeatB | 1800 | AGGAATACAAAAAAGGACACATTTGATATTTAAAAAAGGCAAGATTTCTGAGTAAATCGAAGATGATATATCTCTTTTGTGCAAGTGTGAGGACAG       | 1899 |
| Epi-d1-repeatB     | 1800 | AGGAATACAAAAAAGGACACATTTGATATTTAAAAAAGGCAAGATTTCTGAGTAAATCGAAGATGATATATCTCTTTTGTGCAAGTGTGAGGACAG       | 1899 |
| Nipponbare-repeatC | 1800 | AGGAATACAAAAAAGGACACATTTGATATTTAAAAAAGGCAAGATTTCTGAGTAAATCGAAGATGATATATCTCTTTTGTGCAAGTGTGAGGACAG       | 1899 |
| Epi-d1-repeatC     | 1800 | AGGAATACAAAAAAGGACACATTTGATATTTAAAAAAGGCAAGATTTCTGAGTAAATCGAAGATGATATATCTCTTTTGTGCAAGTGTGAGGACAG       | 1899 |
| Nipponbare-repeatA | 1886 | CTTAAACACCTTGTATCACTACTGCTAGTTTACAATCACGGACATCTTCTCGACTATTTAAACATGCACCATCACCGAGATTTCCGCATCGAAGGAGTT    | 1985 |
| Epi-d1-repeatA     | 1887 | CTTAAACACCTTGTATCACTACTGCTAGTTTACAATCACGGACATCTTCTCGACTATTTAAACATGCACCATCACCGAGATTTCCGCATCGAAGGAGTT    | 1986 |
| Nipponbare-repeatB | 1900 | CTTAAACACCTTGTATCACTACTGCTAGTTTACAATCACGGACATCTTCTCGACTATTTAAACATGCACCATCACCGAGATTTCCGCATCGAAGGAGTT    | 1999 |
| Epi-d1-repeatB     | 1900 | CTTAAACACCTTGTATCACTACTGCTAGTTTACAATCACGGACATCTTCTCGACTATTTAAACATGCACCATCACCGAGATTTCCGCATCGAAGGAGTT    | 1999 |
| Nipponbare-repeatC | 1900 | CTTAAACACCTTGTATCACTACTGCTAGTTTACAATCACGGACATCTTCTCGACTATTTAAACATGCACCATCACCGAGATTTCCGCATCGAAGGAGTT    | 1999 |
| Epi-d1-repeatC     | 1900 | CTTAAACACCTTGTATCACTACTGCTAGTTTACAATCACGGACATCTTCTCGACTATTTAAACATGCACCATCACCGAGATTTCCGCATCGAAGGAGTT    | 1999 |
| Nipponbare-repeatA | 1986 | CAAGGTTCAATGTGTCAGAGTCGATGCTGTGAGTTACTTCATTTGCTTTTCTCTTGTGCTGATATTAGAAAATCAAGTTTCTGCACTGAGTTTGTATAT    | 2085 |
| Epi-d1-repeatA     | 1987 | CAAGGTTCAATGTGTCAGAGTCGATGCTGTGAGTTACTTCATTTGCTTTTCTCTTGTGCTGATATTAGAAAATCAAGTTTCTGCACTGAGTTTGTATAT    | 2086 |
| Nipponbare-repeatB | 2000 | CAAGGTTCAATGTGTCAGAGTCGATGCTGTGAGTTACTTCATTTGCTTTTCTCTTGTGCTGATATTAGAAAATCAAGTTTCTGCACTGAGTTTGTATAT    | 2099 |
| Epi-d1-repeatB     | 2000 | CAAGGTTCAATGTGTCAGAGTCGATGCTGTGAGTTACTTCATTTGCTTTTCTCTTGTGCTGATATTAGAAAATCAAGTTTCTGCACTGAGTTTGTATAT    | 2099 |
| Nipponbare-repeatC | 2000 | CAAGGTTCAATGTGTCAGAGTCGATGCTGTGAGTTACTTCATTTGCTTTTCTCTTGTGCTGATATTAGAAAATCAAGTTTCTGCACTGAGTTTGTATAT    | 2099 |
| Epi-d1-repeatC     | 2000 | CAAGGTTCAATGTGTCAGAGTCGATGCTGTGAGTTACTTCATTTGCTTTTCTCTTGTGCTGATATTAGAAAATCAAGTTTCTGCACTGAGTTTGTATAT    | 2099 |
| Nipponbare-repeatA | 2086 | TTTAATTTTACAGGATTTCTATTCCACACTTGGTGTTCCTCAAGAAATGCTAGTAAATCGAAAATCAAGAGTGGTAGGTGTGGTTTATTGTGCTAGTTAGGG | 2185 |
| Epi-d1-repeatA     | 2087 | TTTAATTTTACAGGATTTCTATTCCACACTTGGTGTTCCTCAAGAAATGCTAGTAAATCGAAAATCAAGAGTGGTAGGTGTGGTTTATTGTGCTAGTTAGGG | 2186 |
| Nipponbare-repeatB | 2100 | TTTAATTTTACAGGATTTCTATTCCACACTTGGTGTTCCTCAAGAAATGCTAGTAAATCGAAAATCAAGAGTGGTAGGTGTGGTTTATTGTGCTAGTTAGGG | 2199 |
| Epi-d1-repeatB     | 2100 | TTTAATTTTACAGGATTTCTATTCCACACTTGGTGTTCCTCAAGAAATGCTAGTAAATCGAAAATCAAGAGTGGTAGGTGTGGTTTATTGTGCTAGTTAGGG | 2199 |
| Nipponbare-repeatC | 2100 | TTTAATTTTACAGGATTTCTATTCCACACTTGGTGTTCCTCAAGAAATGCTAGTAAATCGAAAATCAAGAGTGGTAGGTGTGGTTTATTGTGCTAGTTAGGG | 2199 |
| Epi-d1-repeatC     | 2100 | TTTAATTTTACAGGATTTCTATTCCACACTTGGTGTTCCTCAAGAAATGCTAGTAAATCGAAAATCAAGAGTGGTAGGTGTGGTTTATTGTGCTAGTTAGGG | 2199 |
| Nipponbare-repeatA | 2186 | CATGCACTGATTTGGTGTCTCCGTACAATCGTAGGAGTATTACCCAGCTTTGCTTCTTCTAGTTTGAAGCTGGTTGTAGGTTTGTAGGTAACCTATAATT   | 2285 |
| Epi-d1-repeatA     | 2187 | CATGCACTGATTTGGTGTCTCCGTACAATCGTAGGAGTATTACCCAGCTTTGCTTCTTCTAGTTTGAAGCTGGTTGTAGGTTTGTAGGTAACCTATAATT   | 2286 |
| Nipponbare-repeatB | 2200 | CATGCACTGATTTGGTGTCTCCGTACAATCGTAGGAGTATTACCCAGCTTTGCTTCTTCTAGTTTGAAGCTGGTTGTAGGTTTGTAGGTAACCTATAATT   | 2299 |
| Epi-d1-repeatB     | 2200 | CATGCACTGATTTGGTGTCTCCGTACAATCGTAGGAGTATTACCCAGCTTTGCTTCTTCTAGTTTGAAGCTGGTTGTAGGTTTGTAGGTAACCTATAATT   | 2299 |
| Nipponbare-repeatC | 2200 | CATGCACTGATTTGGTGTCTCCGTACAATCGTAGGAGTATTACCCAGCTTTGCTTCTTCTAGTTTGAAGCTGGTTGTAGGTTTGTAGGTAACCTATAATT   | 2299 |
| Epi-d1-repeatC     | 2200 | CATGCACTGATTTGGTGTCTCCGTACAATCGTAGGAGTATTACCCAGCTTTGCTTCTTCTAGTTTGAAGCTGGTTGTAGGTTTGTAGGTAACCTATAATT   | 2299 |
| Nipponbare-repeatA | 2286 | TACCAACAAACAGAGCTGCTTTTCATGTGGCTATTAGTGTAGATTAAGTTTAAATCATACGTGTTACAGTGTGAAAACAAAATATATGTACACAGAA      | 2385 |
| Epi-d1-repeatA     | 2287 | TACCAACAAACAGAGCTGCTTTTCATGTGGCTATTAGTGTAGATTAAGTTTAAATCATACGTGTTACAGTGTGAAAACAAAATATATGTACACAGAA      | 2386 |
| Nipponbare-repeatB | 2300 | TACCAACAAACAGAGCTGCTTTTCATGTGGCTATTAGTGTAGATTAAGTTTAAATCATACGTGTTACAGTGTGAAAACAAAATATATGTACACAGAA      | 2399 |
| Epi-d1-repeatB     | 2300 | TACCAACAAACAGAGCTGCTTTTCATGTGGCTATTAGTGTAGATTAAGTTTAAATCATACGTGTTACAGTGTGAAAACAAAATATATGTACACAGAA      | 2399 |
| Nipponbare-repeatC | 2300 | TACCAACAAACAGAGCTGCTTTTCATGTGGCTATTAGTGTAGATTAAGTTTAAATCATACGTGTTACAGTGTGAAAACAAAATATATGTACACAGAA      | 2399 |
| Epi-d1-repeatC     | 2300 | TACCAACAAACAGAGCTGCTTTTCATGTGGCTATTAGTGTAGATTAAGTTTAAATCATACGTGTTACAGTGTGAAAACAAAATATATGTACACAGAA      | 2399 |
| Nipponbare-repeatA | 2386 | ACTGTTAAGCTTCCAGGGAAGATATGAAATATATAAAGTCTTTTCAAACTGGCCATAGTGAGCTTTATGGCCCACTGTTTGTGTTCTCGAAAAGCTT      | 2485 |
| Epi-d1-repeatA     | 2387 | ACTGTTAAGCTTCCAGGGAAGATATGAAATATATAAAGTCTTTTCAAACTGGCCATAGTGAGCTTTATGGCCCACTGTTTGTGTTCTCGAAAAGCTT      | 2486 |
| Nipponbare-repeatB | 2400 | ACTGTTAAGCTTCCAGGGAAGATATGAAATATATAAAGTCTTTTCAAACTGGCCATAGTGAGCTTTATGGCCCACTGTTTGTGTTCTCGAAAAGCTT      | 2499 |
| Epi-d1-repeatB     | 2400 | ACTGTTAAGCTTCCAGGGAAGATATGAAATATATAAAGTCTTTTCAAACTGGCCATAGTGAGCTTTATGGCCCACTGTTTGTGTTCTCGAAAAGCTT      | 2499 |
| Nipponbare-repeatC | 2400 | ACTGTTAAGCTTCCAGGGAAGATATGAAATATATAAAGTCTTTTCAAACTGGCCATAGTGAGCTTTATGGCCCACTGTTTGTGTTCTCGAAAAGCTT      | 2499 |
| Epi-d1-repeatC     | 2400 | ACTGTTAAGCTTCCAGGGAAGATATGAAATATATAAAGTCTTTTCAAACTGGCCATAGTGAGCTTTATGGCCCACTGTTTGTGTTCTCGAAAAGCTT      | 2499 |
| Nipponbare-repeatA | 2486 | TACTATTCTACTAGTAACCAAAATTTTGTCTATTTCATCTAATTTGAAGGCTATCTCAGCAAAAACCCCTTGAACATTTCTAAGCAAGCCTATGCTGTC    | 2585 |
| Epi-d1-repeatA     | 2487 | TACTATTCTACTAGTAACCAAAATTTTGTCTATTTCATCTAATTTGAAGGCTATCTCAGCAAAAACCCCTTGAACATTTCTAAGCAAGCCTATGCTGTC    | 2586 |
| Nipponbare-repeatB | 2500 | TACTATTCTACTAGTAACCAAAATTTTGTCTATTTCATCTAATTTGAAGGCTATCTCAGCAAAAACCCCTTGAACATTTCTAAGCAAGCCTATGCTGTC    | 2599 |
| Epi-d1-repeatB     | 2500 | TACTATTCTACTAGTAACCAAAATTTTGTCTATTTCATCTAATTTGAAGGCTATCTCAGCAAAAACCCCTTGAACATTTCTAAGCAAGCCTATGCTGTC    | 2599 |
| Nipponbare-repeatC | 2500 | TACTATTCTACTAGTAACCAAAATTTTGTCTATTTCATCTAATTTGAAGGCTATCTCAGCAAAAACCCCTTGAACATTTCTAAGCAAGCCTATGCTGTC    | 2599 |
| Epi-d1-repeatC     | 2500 | TACTATTCTACTAGTAACCAAAATTTTGTCTATTTCATCTAATTTGAAGGCTATCTCAGCAAAAACCCCTTGAACATTTCTAAGCAAGCCTATGCTGTC    | 2599 |
| Nipponbare-repeatA | 2586 | TTCAATATCATTTTCTGCAACTGATCATCTTGCGTTCTAGACTCGATAGTTTATATTTCTGAAAATCTATTGTTGGCACTTCTCATTGATGCAATTGT     | 2685 |
| Epi-d1-repeatA     | 2587 | TTCAATATCATTTTCTGCAACTGATCATCTTGCGTTCTAGACTCGATAGTTTATATTTCTGAAAATCTATTGTTGGCACTTCTCATTGATGCAATTGT     | 2686 |
| Nipponbare-repeatB | 2600 | TTCAATATCATTTTCTGCAACTGATCATCTTGCGTTCTAGACTCGATAGTTTATATTTCTGAAAATCTATTGTTGGCACTTCTCATTGATGCAATTGT     | 2699 |
| Epi-d1-repeatB     | 2600 | TTCAATATCATTTTCTGCAACTGATCATCTTGCGTTCTAGACTCGATAGTTTATATTTCTGAAAATCTATTGTTGGCACTTCTCATTGATGCAATTGT     | 2699 |
| Nipponbare-repeatC | 2600 | TTCAATATCATTTTCTGCAACTGATCATCTTGCGTTCTAGACTCGATAGTTTATATTTCTGAAAATCTATTGTTGGCACTTCTCATTGATGCAATTGT     | 2699 |
| Epi-d1-repeatC     | 2600 | TTCAATATCATTTTCTGCAACTGATCATCTTGCGTTCTAGACTCGATAGTTTATATTTCTGAAAATCTATTGTTGGCACTTCTCATTGATGCAATTGT     | 2699 |
| Nipponbare-repeatA | 2686 | TTGATGAGGCTTCAATCCTGCTCCACGTGTGTGAGGAGAAATTTTGAACAAAATCCCAACCCACACCCGTAGATAATCTAGGATTTGTGCTATCCA       | 2785 |
| Epi-d1-repeatA     | 2687 | TTGATGAGGCTTCAATCCTGCTCCACGTGTGTGAGGAGAAATTTTGAACAAAATCCCAACCCACACCCGTAGATAATCTAGGATTTGTGCTATCCA       | 2786 |
| Nipponbare-repeatB | 2700 | TTGATGAGGCTTCAATCCTGCTCCACGTGTGTGAGGAGAAATTTTGAACAAAATCCCAACCCACACCCGTAGATAATCTAGGATTTGTGCTATCCA       | 2799 |
| Epi-d1-repeatB     | 2700 | TTGATGAGGCTTCAATCCTGCTCCACGTGTGTGAGGAGAAATTTTGAACAAAATCCCAACCCACACCCGTAGATAATCTAGGATTTGTGCTATCCA       | 2799 |
| Nipponbare-repeatC | 2700 | TTGATGAGGCTTCAATCCTGCTCCACGTGTGTGAGGAGAAATTTTGAACAAAATCCCAACCCACACCCGTAGATAATCTAGGATTTGTGCTATCCA       | 2799 |
| Epi-d1-repeatC     | 2700 | TTGATGAGGCTTCAATCCTGCTCCACGTGTGTGAGGAGAAATTTTGAACAAAATCCCAACCCACACCCGTAGATAATCTAGGATTTGTGCTATCCA       | 2799 |

Fig. S2 continued.

|                    |      |                                                                                                       |      |
|--------------------|------|-------------------------------------------------------------------------------------------------------|------|
| Nipponbare-repeata | 2786 | AATAATGCTTAAGGGGATATTATGTAGAAATCCTTCAGAGTCAATTTTGATCAAAATATGTGTAGTATTTAATGTGCTTTCTATTGTAGTCTCAAAA     | 2885 |
| Epi-d1-repeata     | 2787 | AATAATGCTTAAGGGGATATTATGTAGAAATCCTTCAGAGTCAATTTTGATCAAAATATGTGTAGTATTTAATGTGCTTTCTATTGTAGTCTCAAAA     | 2886 |
| Nipponbare-repeatB | 2800 | AATAATGCTTAAGGGGATATTATGTAGAAATCCTTCAGAGTCAATTTTGATCAAAATATGTGTAGTATTTAATGTGCTTTCTATTGTAGTCTCAAAA     | 2889 |
| Epi-d1-repeatB     | 2800 | AATAATGCTTAAGGGGATATTATGTAGAAATCCTTCAGAGTCAATTTTGATCAAAATATGTGTAGTATTTAATGTGCTTTCTATTGTAGTCTCAAAA     | 2899 |
| Nipponbare-repeatC | 2800 | AATAATGCTTAAGGGGATATTATGTAGAAATCCTTCAGAGTCAATTTTGATCAAAATATGTGTAGTATTTAATGTGCTTTCTATTGTAGTCTCAAAA     | 2899 |
| Epi-d1-repeatC     | 2800 | AATAATGCTTAAGGGGATATTATGTAGAAATCCTTCAGAGTCAATTTTGATCAAAATATGTGTAGTATTTAATGTGCTTTCTATTGTAGTCTCAAAA     | 2899 |
| Nipponbare-repeata | 2886 | TGGTCTCTCTTTTCCAGCCTATAGGAAGCTTGCAGGAGCTACCATCTGATGTGAACAAGTAAGTACTAACCATATATAGGGAATTTGTGTTTCAGCTAC   | 2985 |
| Epi-d1-repeata     | 2887 | TGGTCTCTCTTTTCCAGCCTATAGGAAGCTTGCAGGAGCTACCATCTGATGTGAACAAGTAAGTACTAACCATATATAGGGAATTTGTGTTTCAGCTAC   | 2986 |
| Nipponbare-repeatB | 2900 | TGGTCTCTCTTTTCCAGCCTATAGGAAGCTTGCAGGAGCTACCATCTGATGTGAACAAGTAAGTACTAACCATATATAGGGAATTTGTGTTTCAGCTAC   | 2999 |
| Epi-d1-repeatB     | 2900 | TGGTCTCTCTTTTCCAGCCTATAGGAAGCTTGCAGGAGCTACCATCTGATGTGAACAAGTAAGTACTAACCATATATAGGGAATTTGTGTTTCAGCTAC   | 2999 |
| Nipponbare-repeatC | 2900 | TGGTCTCTCTTTTCCAGCCTATAGGAAGCTTGCAGGAGCTACCATCTGATGTGAACAAGTAAGTACTAACCATATATAGGGAATTTGTGTTTCAGCTAC   | 2999 |
| Epi-d1-repeatC     | 2900 | TGGTCTCTCTTTTCCAGCCTATAGGAAGCTTGCAGGAGCTACCATCTGATGTGAACAAGTAAGTACTAACCATATATAGGGAATTTGTGTTTCAGCTAC   | 2999 |
| Nipponbare-repeata | 2986 | ACTCGATATATTGCTCTCTTTTCTCCTTTTGTGATCATTATAAACCCTGAGTACTAGTGTGTCATTACCTTTTTCATAACTACATAATCAAAATAGCAATT | 3085 |
| Epi-d1-repeata     | 2987 | ACTCGATATATTGCTCTCTTTTCTCCTTTTGTGATCATTATAAACCCTGAGTACTAGTGTGTCATTACCTTTTTCATAACTACATAATCAAAATAGCAATT | 3086 |
| Nipponbare-repeatB | 3000 | ACTCGATATATTGCTCTCTTTTCTCCTTTTGTGATCATTATAAACCCTGAGTACTAGTGTGTCATTACCTTTTTCATAACTACATAATCAAAATAGCAATT | 3099 |
| Epi-d1-repeatB     | 3000 | ACTCGATATATTGCTCTCTTTTCTCCTTTTGTGATCATTATAAACCCTGAGTACTAGTGTGTCATTACCTTTTTCATAACTACATAATCAAAATAGCAATT | 3099 |
| Nipponbare-repeatC | 3000 | ACTCGATATATTGCTCTCTTTTCTCCTTTTGTGATCATTATAAACCCTGAGTACTAGTGTGTCATTACCTTTTTCATAACTACATAATCAAAATAGCAATT | 3099 |
| Epi-d1-repeatC     | 3000 | ACTCGATATATTGCTCTCTTTTCTCCTTTTGTGATCATTATAAACCCTGAGTACTAGTGTGTCATTACCTTTTTCATAACTACATAATCAAAATAGCAATT | 3099 |
| Nipponbare-repeata | 3086 | PTATGCTGTGTATTTTCTTTAGAGATCCTGCTGCTGAACAAAAGTTCAGGATATTAGCAATGCTTATGAGGTAGTCCAGCTAACCTAACCAAAAT       | 3185 |
| Epi-d1-repeata     | 3087 | PTATGCTGTGTATTTTCTTTAGAGATCCTGCTGCTGAACAAAAGTTCAGGATATTAGCAATGCTTATGAGGTAGTCCAGCTAACCTAACCAAAAT       | 3186 |
| Nipponbare-repeatB | 3100 | PTATGCTGTGTATTTTCTTTAGAGATCCTGCTGCTGAACAAAAGTTCAGGATATTAGCAATGCTTATGAGGTAGTCCAGCTAACCTAACCAAAAT       | 3199 |
| Epi-d1-repeatB     | 3100 | PTATGCTGTGTATTTTCTTTAGAGATCCTGCTGCTGAACAAAAGTTCAGGATATTAGCAATGCTTATGAGGTAGTCCAGCTAACCTAACCAAAAT       | 3199 |
| Nipponbare-repeatC | 3100 | PTATGCTGTGTATTTTCTTTAGAGATCCTGCTGCTGAACAAAAGTTCAGGATATTAGCAATGCTTATGAGGTAGTCCAGCTAACCTAACCAAAAT       | 3199 |
| Epi-d1-repeatC     | 3100 | PTATGCTGTGTATTTTCTTTAGAGATCCTGCTGCTGAACAAAAGTTCAGGATATTAGCAATGCTTATGAGGTAGTCCAGCTAACCTAACCAAAAT       | 3199 |
| Nipponbare-repeata | 3186 | CCCATTTGTTCTTATGACTATGTTGTTGAGGGTTACAGGTGCTTGCAGCTAACATAAATAGGATTGACGGTTTGTCTGATGATGAGAGCGATCAAT      | 3285 |
| Epi-d1-repeata     | 3187 | CCCATTTGTTCTTATGACTATGTTGTTGAGGGTTACAGGTGCTTGCAGCTAACATAAATAGGATTGACGGTTTGTCTGATGATGAGAGCGATCAAT      | 3286 |
| Nipponbare-repeatB | 3200 | CCCATTTGTTCTTATGACTATGTTGTTGAGGGTTACAGGTGCTTGCAGCTAACATAAATAGGATTGACGGTTTGTCTGATGATGAGAGCGATCAAT      | 3299 |
| Epi-d1-repeatB     | 3200 | CCCATTTGTTCTTATGACTATGTTGTTGAGGGTTACAGGTGCTTGCAGCTAACATAAATAGGATTGACGGTTTGTCTGATGATGAGAGCGATCAAT      | 3299 |
| Nipponbare-repeatC | 3200 | CCCATTTGTTCTTATGACTATGTTGTTGAGGGTTACAGGTGCTTGCAGCTAACATAAATAGGATTGACGGTTTGTCTGATGATGAGAGCGATCAAT      | 3299 |
| Epi-d1-repeatC     | 3200 | CCCATTTGTTCTTATGACTATGTTGTTGAGGGTTACAGGTGCTTGCAGCTAACATAAATAGGATTGACGGTTTGTCTGATGATGAGAGCGATCAAT      | 3299 |
| Nipponbare-repeata | 3286 | CTATGATAAATATGGAAGAGCTGGTTTGAAGGGTCTGGAATGGGAACAGAGTGAAGTCTTCTAGAATGTTGTCGAATTCGAAATATGATCAGCATGA     | 3385 |
| Epi-d1-repeata     | 3287 | CTATGATAAATATGGAAGAGCTGGTTTGAAGGGTCTGGAATGGGAACAGAGTGAAGTCTTCTAGAATGTTGTCGAATTCGAAATATGATCAGCATGA     | 3386 |
| Nipponbare-repeatB | 3300 | CTATGATAAATATGGAAGAGCTGGTTTGAAGGGTCTGGAATGGGAACAGAGTGAAGTCTTCTAGAATGTTGTCGAATTCGAAATATGATCAGCATGA     | 3399 |
| Epi-d1-repeatB     | 3300 | CTATGATAAATATGGAAGAGCTGGTTTGAAGGGTCTGGAATGGGAACAGAGTGAAGTCTTCTAGAATGTTGTCGAATTCGAAATATGATCAGCATGA     | 3399 |
| Nipponbare-repeatC | 3300 | CTATGATAAATATGGAAGAGCTGGTTTGAAGGGTCTGGAATGGGAACAGAGTGAAGTCTTCTAGAATGTTGTCGAATTCGAAATATGATCAGCATGA     | 3399 |
| Epi-d1-repeatC     | 3300 | CTATGATAAATATGGAAGAGCTGGTTTGAAGGGTCTGGAATGGGAACAGAGTGAAGTCTTCTAGAATGTTGTCGAATTCGAAATATGATCAGCATGA     | 3399 |
| Nipponbare-repeata | 3386 | CTTTATATGATATTGATTGTATGAAATTTTGAATCTGCAAGGATTACTCAACCCATTGATCTCTTTGAATCATTATTGAAAGCTTTGGTGAATG        | 3485 |
| Epi-d1-repeata     | 3387 | CTTTATATGATATTGATTGTATGAAATTTTGAATCTGCAAGGATTACTCAACCCATTGATCTCTTTGAATCATTATTGAAAGCTTTGGTGAATG        | 3486 |
| Nipponbare-repeatB | 3400 | CTTTATATGATATTGATTGTATGAAATTTTGAATCTGCAAGGATTACTCAACCCATTGATCTCTTTGAATCATTATTGAAAGCTTTGGTGAATG        | 3499 |
| Epi-d1-repeatB     | 3400 | CTTTATATGATATTGATTGTATGAAATTTTGAATCTGCAAGGATTACTCAACCCATTGATCTCTTTGAATCATTATTGAAAGCTTTGGTGAATG        | 3499 |
| Nipponbare-repeatC | 3400 | CTTTATATGATATTGATTGTATGAAATTTTGAATCTGCAAGGATTACTCAACCCATTGATCTCTTTGAATCATTATTGAAAGCTTTGGTGAATG        | 3499 |
| Epi-d1-repeatC     | 3400 | CTTTATATGATATTGATTGTATGAAATTTTGAATCTGCAAGGATTACTCAACCCATTGATCTCTTTGAATCATTATTGAAAGCTTTGGTGAATG        | 3499 |
| Nipponbare-repeata | 3486 | GGGGAATGGGAGGCGCTGCTGCTCGGAACAGACCAATGCAAGGATGATGAGGCTCACAATCTGGTACTCAATTTCAAGGAAGCGGTGTTGGTGTAGA     | 3585 |
| Epi-d1-repeata     | 3487 | GGGGAATGGGAGGCGCTGCTGCTCGGAACAGACCAATGCAAGGATGATGAGGCTCACAATCTGGTACTCAATTTCAAGGAAGCGGTGTTGGTGTAGA     | 3586 |
| Nipponbare-repeatB | 3500 | GGGGAATGGGAGGCGCTGCTGCTCGGAACAGACCAATGCAAGGATGATGAGGCTCACAATCTGGTACTCAATTTCAAGGAAGCGGTGTTGGTGTAGA     | 3599 |
| Epi-d1-repeatB     | 3500 | GGGGAATGGGAGGCGCTGCTGCTCGGAACAGACCAATGCAAGGATGATGAGGCTCACAATCTGGTACTCAATTTCAAGGAAGCGGTGTTGGTGTAGA     | 3599 |
| Nipponbare-repeatC | 3500 | GGGGAATGGGAGGCGCTGCTGCTCGGAACAGACCAATGCAAGGATGATGAGGCTCACAATCTGGTACTCAATTTCAAGGAAGCGGTGTTGGTGTAGA     | 3599 |
| Epi-d1-repeatC     | 3500 | GGGGAATGGGAGGCGCTGCTGCTCGGAACAGACCAATGCAAGGATGATGAGGCTCACAATCTGGTACTCAATTTCAAGGAAGCGGTGTTGGTGTAGA     | 3599 |
| Nipponbare-repeata | 3586 | GAAGGAAATAGSATCACCAGACTGGAAGGCTGTAATACATGTGATGGAATCTGCTGCAAGCTGGAACGAAACCAACACATGCAAAACATGTGGAGGA     | 3685 |
| Epi-d1-repeata     | 3587 | GAAGGAAATAGSATCACCAGACTGGAAGGCTGTAATACATGTGATGGAATCTGCTGCAAGCTGGAACGAAACCAACACATGCAAAACATGTGGAGGA     | 3686 |
| Nipponbare-repeatB | 3600 | GAAGGAAATAGSATCACCAGACTGGAAGGCTGTAATACATGTGATGGAATCTGCTGCAAGCTGGAACGAAACCAACACATGCAAAACATGTGGAGGA     | 3699 |
| Epi-d1-repeatB     | 3600 | GAAGGAAATAGSATCACCAGACTGGAAGGCTGTAATACATGTGATGGAATCTGCTGCAAGCTGGAACGAAACCAACACATGCAAAACATGTGGAGGA     | 3699 |
| Nipponbare-repeatC | 3600 | GAAGGAAATAGSATCACCAGACTGGAAGGCTGTAATACATGTGATGGAATCTGCTGCAAGCTGGAACGAAACCAACACATGCAAAACATGTGGAGGA     | 3699 |
| Epi-d1-repeatC     | 3600 | GAAGGAAATAGSATCACCAGACTGGAAGGCTGTAATACATGTGATGGAATCTGCTGCAAGCTGGAACGAAACCAACACATGCAAAACATGTGGAGGA     | 3699 |
| Nipponbare-repeata | 3686 | CAGGACCAAGTGGTCTCTCAACAGAACGCACTTGGAAATTTCCAGAGGCTCCACCTGCAATCTTGCAGAGGACCTGGTGAATCTCTACCCCGT         | 3785 |
| Epi-d1-repeata     | 3687 | CAGGACCAAGTGGTCTCTCAACAGAACGCACTTGGAAATTTCCAGAGGCTCCACCTGCAATCTTGCAGAGGACCTGGTGAATCTCTACCCCGT         | 3786 |
| Nipponbare-repeatB | 3700 | CAGGACCAAGTGGTCTCTCAACAGAACGCACTTGGAAATTTCCAGAGGCTCCACCTGCAATCTTGCAGAGGACCTGGTGAATCTCTACCCCGT         | 3799 |
| Epi-d1-repeatB     | 3700 | CAGGACCAAGTGGTCTCTCAACAGAACGCACTTGGAAATTTCCAGAGGCTCCACCTGCAATCTTGCAGAGGACCTGGTGAATCTCTACCCCGT         | 3799 |
| Nipponbare-repeatC | 3700 | CAGGACCAAGTGGTCTCTCAACAGAACGCACTTGGAAATTTCCAGAGGCTCCACCTGCAATCTTGCAGAGGACCTGGTGAATCTCTACCCCGT         | 3799 |
| Epi-d1-repeatC     | 3700 | CAGGACCAAGTGGTCTCTCAACAGAACGCACTTGGAAATTTCCAGAGGCTCCACCTGCAATCTTGCAGAGGACCTGGTGAATCTCTACCCCGT         | 3799 |
| Nipponbare-repeata | 3786 | CAACACTTGTGGGGGTGATGGCCGAGTGCAGAGCAAAAAGGATCACTTAAAGGTTCTCTGCTGGTGTGATTCTGGAAGCAGATTGAGGGTCCGGTC      | 3885 |
| Epi-d1-repeata     | 3787 | CAACACTTGTGGGGGTGATGGCCGAGTGCAGAGCAAAAAGGATCACTTAAAGGTTCTCTGCTGGTGTGATTCTGGAAGCAGATTGAGGGTCCGGTC      | 3886 |
| Nipponbare-repeatB | 3800 | CAACACTTGTGGGGGTGATGGCCGAGTGCAGAGCAAAAAGGATCACTTAAAGGTTCTCTGCTGGTGTGATTCTGGAAGCAGATTGAGGGTCCGGTC      | 3899 |
| Epi-d1-repeatB     | 3800 | CAACACTTGTGGGGGTGATGGCCGAGTGCAGAGCAAAAAGGATCACTTAAAGGTTCTCTGCTGGTGTGATTCTGGAAGCAGATTGAGGGTCCGGTC      | 3899 |
| Nipponbare-repeatC | 3800 | CAACACTTGTGGGGGTGATGGCCGAGTGCAGAGCAAAAAGGATCACTTAAAGGTTCTCTGCTGGTGTGATTCTGGAAGCAGATTGAGGGTCCGGTC      | 3899 |
| Epi-d1-repeatC     | 3800 | CAACACTTGTGGGGGTGATGGCCGAGTGCAGAGCAAAAAGGATCACTTAAAGGTTCTCTGCTGGTGTGATTCTGGAAGCAGATTGAGGGTCCGGTC      | 3899 |
| Nipponbare-repeata | 3886 | TGAGGGGAATGCTGGGCGGAGAGGAGGCCCTCTCGGAGATCTTTATGTGTTTATTGATGTTCTCTGATCTGTTCTTAAGCAGATGGGCAAAACATT      | 3985 |
| Epi-d1-repeata     | 3887 | TGAGGGGAATGCTGGGCGGAGAGGAGGCCCTCTCGGAGATCTTTATGTGTTTATTGATGTTCTCTGATCTGTTCTTAAGCAGATGGGCAAAACATT      | 3986 |
| Nipponbare-repeatB | 3900 | TGAGGGGAATGCTGGGCGGAGAGGAGGCCCTCTCGGAGATCTTTATGTGTTTATTGATGTTCTCTGATCTGTTCTTAAGCAGATGGGCAAAACATT      | 3999 |
| Epi-d1-repeatB     | 3900 | TGAGGGGAATGCTGGGCGGAGAGGAGGCCCTCTCGGAGATCTTTATGTGTTTATTGATGTTCTCTGATCTGTTCTTAAGCAGATGGGCAAAACATT      | 3999 |
| Nipponbare-repeatC | 3900 | TGAGGGGAATGCTGGGCGGAGAGGAGGCCCTCTCGGAGATCTTTATGTGTTTATTGATGTTCTCTGATCTGTTCTTAAGCAGATGGGCAAAACATT      | 3999 |
| Epi-d1-repeatC     | 3900 | TGAGGGGAATGCTGGGCGGAGAGGAGGCCCTCTCGGAGATCTTTATGTGTTTATTGATGTTCTCTGATCTGTTCTTAAGCAGATGGGCAAAACATT      | 3999 |
| Nipponbare-repeata | 3986 | CTATACACATGCAAAATTTTATATATTGACGCAATTTCTGGGCAACCGCTCAAGGTTCCCACTGTTGATGGGATGGTGAACCTGAAGATCCCCCTCGGTA  | 4085 |
| Epi-d1-repeata     | 3987 | CTATACACATGCAAAATTTTATATATTGACGCAATTTCTGGGCAACCGCTCAAGGTTCCCACTGTTGATGGGATGGTGAACCTGAAGATCCCCCTCGGTA  | 4086 |
| Nipponbare-repeatB | 4000 | CTATACACATGCAAAATTTTATATATTGACGCAATTTCTGGGCAACCGCTCAAGGTTCCCACTGTTGATGGGATGGTGAACCTGAAGATCCCCCTCGGTA  | 4099 |
| Epi-d1-repeatB     | 4000 | CTATACACATGCAAAATTTTATATATTGACGCAATTTCTGGGCAACCGCTCAAGGTTCCCACTGTTGATGGGATGGTGAACCTGAAGATCCCCCTCGGTA  | 4099 |
| Nipponbare-repeatC | 4000 | CTATACACATGCAAAATTTTATATATTGACGCAATTTCTGGGCAACCGCTCAAGGTTCCCACTGTTGATGGGATGGTGAACCTGAAGATCCCCCTCGGTA  | 4099 |
| Epi-d1-repeatC     | 4000 | CTATACACATGCAAAATTTTATATATTGACGCAATTTCTGGGCAACCGCTCAAGGTTCCCACTGTTGATGGGATGGTGAACCTGAAGATCCCCCTCGGTA  | 4099 |
| Nipponbare-repeata | 4086 | CCAGCCAGGACCAACGTTTATGATGTCCAGAAAGAGTGTCCCACTCTCGGGAAGTCAAAATGCTGTGGAGACCAAGCTAGTGGTGTGACAGTGCAGAT    | 4185 |
| Epi-d1-repeata     | 4087 | CCAGCCAGGACCAACGTTTATGATGTCCAGAAAGAGTGTCCCACTCTCGGGAAGTCAAAATGCTGTGGAGACCAAGCTAGTGGTGTGACAGTGCAGAT    | 4186 |
| Nipponbare-repeatB | 4100 | CCAGCCAGGACCAACGTTTATGATGTCCAGAAAGAGTGTCCCACTCTCGGGAAGTCAAAATGCTGTGGAGACCAAGCTAGTGGTGTGACAGTGCAGAT    | 4199 |
| Epi-d1-repeatB     | 4100 | CCAGCCAGGACCAACGTTTATGATGTCCAGAAAGAGTGTCCCACTCTCGGGAAGTCAAAATGCTGTGGAGACCAAGCTAGTGGTGTGACAGTGCAGAT    | 4199 |
| Nipponbare-repeatC | 4100 | CCAGCCAGGACCAACGTTTATGATGTCCAGAAAGAGTGTCCCACTCTCGGGAAGTCAAAATGCTGTGGAGACCAAGCTAGTGGTGTGACAGTGCAGAT    | 4199 |
| Epi-d1-repeatC     | 4100 | CCAGCCAGGACCAACGTTTATGATGTCCAGAAAGAGTGTCCCACTCTCGGGAAGTCAAAATGCTGTGGAGACCAAGCTAGTGGTGTGACAGTGCAGAT    | 4199 |

Fig. S2 continued.

**Fig. S2 continued.**

|                    |      |                                                                                                       |      |
|--------------------|------|-------------------------------------------------------------------------------------------------------|------|
| Nipponbare-repeata | 5586 | ATCTAATGGCAATACAGTGCTCAAAATTCCTGCTTCGCGAGTCTTAACTTTACCCGAATCCAATCTGGAAACGAAAAAGACAGTCTGCTGGCTGATGGC   | 5685 |
| Epi-d1-repeata     | 5587 | ATCTAATGGCAATACAGTGCTCAAAATTCCTGCTTCGCGAGTCTTAACTTTACCCGAATCCAATCTGGAAACGAAAAAGACAGTCTGCTGGCTGATGGC   | 5686 |
| Nipponbare-repeatB | 5600 | ATCTAATGGCAATACAGTGCTCAAAATTCCTGCTTCGCGAGTCTTAACTTTACCCGAATCCAATCTGGAAACGAAAAAGACAGTCTGCTGGCTGATGGC   | 5699 |
| Epi-d1-repeatB     | 5600 | ATCTAATGGCAATACAGTGCTCAAAATTCCTGCTTCGCGAGTCTTAACTTTACCCGAATCCAATCTGGAAACGAAAAAGACAGTCTGCTGGCTGATGGC   | 5699 |
| Nipponbare-repeatC | 5600 | ATCTAATGGCAATACAGTGCTCAAAATTCCTGCTTCGCGAGTCTTAACTTTACCCGAATCCAATCTGGAAACGAAAAAGACAGTCTGCTGGCTGATGGC   | 5699 |
| Epi-d1-repeatC     | 5600 | ATCTAATGGCAATACAGTGCTCAAAATTCCTGCTTCGCGAGTCTTAACTTTACCCGAATCCAATCTGGAAACGAAAAAGACAGTCTGCTGGCTGATGGC   | 5699 |
| Nipponbare-repeata | 5686 | AAGTCACTGGGTACATTGATTGTGTAAATTTTCAGTCCAATAAAGACGCAAAAATTTGAAGGGTGATCCCTCTTTAGTAAAGCCATGCATTCTGCAA     | 5785 |
| Epi-d1-repeata     | 5687 | AAGTCACTGGGTACATTGATTGTGTAAATTTTCAGTCCAATAAAGACGCAAAAATTTGAAGGGTGATCCCTCTTTAGTAAAGCCATGCATTCTGCAA     | 5786 |
| Nipponbare-repeatB | 5700 | AAGTCACTGGGTACATTGATTGTGTAAATTTTCAGTCCAATAAAGACGCAAAAATTTGAAGGGTGATCCCTCTTTAGTAAAGCCATGCATTCTGCAA     | 5799 |
| Epi-d1-repeatB     | 5700 | AAGTCACTGGGTACATTGATTGTGTAAATTTTCAGTCCAATAAAGACGCAAAAATTTGAAGGGTGATCCCTCTTTAGTAAAGCCATGCATTCTGCAA     | 5799 |
| Nipponbare-repeatC | 5700 | AAGTCACTGGGTACATTGATTGTGTAAATTTTCAGTCCAATAAAGACGCAAAAATTTGAAGGGTGATCCCTCTTTAGTAAAGCCATGCATTCTGCAA     | 5799 |
| Epi-d1-repeatC     | 5700 | AAGTCACTGGGTACATTGATTGTGTAAATTTTCAGTCCAATAAAGACGCAAAAATTTGAAGGGTGATCCCTCTTTAGTAAAGCCATGCATTCTGCAA     | 5799 |
| Nipponbare-repeata | 5786 | ACTCTGTTGCAATGCAAGCTGTATCTATATCCAGTCCGATGAACCAATTCTGTTTGAGAGCTGTACCTATCTCTACTCTACAAGCAACCAAGGAA       | 5885 |
| Epi-d1-repeata     | 5787 | ACTCTGTTGCAATGCAAGCTGTATCTATATCCAGTCCGATGAACCAATTCTGTTTGAGAGCTGTACCTATCTCTACTCTACAAGCAACCAAGGAA       | 5886 |
| Nipponbare-repeatB | 5800 | ACTCTGTTGCAATGCAAGCTGTATCTATATCCAGTCCGATGAACCAATTCTGTTTGAGAGCTGTACCTATCTCTACTCTACAAGCAACCAAGGAA       | 5899 |
| Epi-d1-repeatB     | 5800 | ACTCTGTTGCAATGCAAGCTGTATCTATATCCAGTCCGATGAACCAATTCTGTTTGAGAGCTGTACCTATCTCTACTCTACAAGCAACCAAGGAA       | 5899 |
| Nipponbare-repeatC | 5800 | ACTCTGTTGCAATGCAAGCTGTATCTATATCCAGTCCGATGAACCAATTCTGTTTGAGAGCTGTACCTATCTCTACTCTACAAGCAACCAAGGAA       | 5899 |
| Epi-d1-repeatC     | 5800 | ACTCTGTTGCAATGCAAGCTGTATCTATATCCAGTCCGATGAACCAATTCTGTTTGAGAGCTGTACCTATCTCTACTCTACAAGCAACCAAGGAA       | 5899 |
| Nipponbare-repeata | 5886 | AGTGTGTTGATCTGCAAGTGAATCTAGCAGATATCCACCAATTTTCAGGGTTGGGAGTGTGATTGATATGCAAGGATTTGACATTGTGCAAGCAATTGGCC | 5985 |
| Epi-d1-repeata     | 5887 | AGTGTGTTGATCTGCAAGTGAATCTAGCAGATATCCACCAATTTTCAGGGTTGGGAGTGTGATTGATATGCAAGGATTTGACATTGTGCAAGCAATTGGCC | 5986 |
| Nipponbare-repeatB | 5900 | AGTGTGTTGATCTGCAAGTGAATCTAGCAGATATCCACCAATTTTCAGGGTTGGGAGTGTGATTGATATGCAAGGATTTGACATTGTGCAAGCAATTGGCC | 5999 |
| Epi-d1-repeatB     | 5900 | AGTGTGTTGATCTGCAAGTGAATCTAGCAGATATCCACCAATTTTCAGGGTTGGGAGTGTGATTGATATGCAAGGATTTGACATTGTGCAAGCAATTGGCC | 5999 |
| Nipponbare-repeatC | 5900 | AGTGTGTTGATCTGCAAGTGAATCTAGCAGATATCCACCAATTTTCAGGGTTGGGAGTGTGATTGATATGCAAGGATTTGACATTGTGCAAGCAATTGGCC | 5999 |
| Epi-d1-repeatC     | 5900 | AGTGTGTTGATCTGCAAGTGAATCTAGCAGATATCCACCAATTTTCAGGGTTGGGAGTGTGATTGATATGCAAGGATTTGACATTGTGCAAGCAATTGGCC | 5999 |
| Nipponbare-repeata | 5986 | CTCAGGCTGCGCTGCGCTGCGCGGTGGTGTGCGTGAAGAAAGCCGCGTGGTGGTGGTGTGTCGCGCGCGAGGAGTGGCTGCAACAGGATGGCTGTTGT    | 6085 |
| Epi-d1-repeata     | 5987 | CTCAGGCTGCGCTGCGCTGCGCGGTGGTGTGCGTGAAGAAAGCCGCGTGGTGGTGGTGTGTCGCGCGCGAGGAGTGGCTGCAACAGGATGGCTGTTGT    | 6086 |
| Nipponbare-repeatB | 6000 | CTCAGGCTGCGCTGCGCTGCGCGGTGGTGTGCGTGAAGAAAGCCGCGTGGTGGTGGTGTGTCGCGCGCGAGGAGTGGCTGCAACAGGATGGCTGTTGT    | 6099 |
| Epi-d1-repeatB     | 6000 | CTCAGGCTGCGCTGCGCTGCGCGGTGGTGTGCGTGAAGAAAGCCGCGTGGTGGTGGTGTGTCGCGCGCGAGGAGTGGCTGCAACAGGATGGCTGTTGT    | 6099 |
| Nipponbare-repeatC | 6000 | CTCAGGCTGCGCTGCGCTGCGCGGTGGTGTGCGTGAAGAAAGCCGCGTGGTGGTGGTGTGTCGCGCGCGAGGAGTGGCTGCAACAGGATGGCTGTTGT    | 6099 |
| Epi-d1-repeatC     | 6000 | CTCAGGCTGCGCTGCGCTGCGCGGTGGTGTGCGTGAAGAAAGCCGCGTGGTGGTGGTGTGTCGCGCGCGAGGAGTGGCTGCAACAGGATGGCTGTTGT    | 6099 |
| Nipponbare-repeata | 6086 | GCATGGGCGGATCAGCGGGTGGCTTATGGCGGTGGGCGCTGTTGCGCGCGAGCGAACCCGCGCGCGCGCTTTCAGAGGGAGCGCGATGATGATC        | 6185 |
| Epi-d1-repeata     | 6087 | GCATGGGCGGATCAGCGGGTGGCTTATGGCGGTGGGCGCTGTTGCGCGCGAGCGAACCCGCGCGCGCGCTTTCAGAGGGAGCGCGATGATGATC        | 6186 |
| Nipponbare-repeatB | 6100 | GCATGGGCGGATCAGCGGGTGGCTTATGGCGGTGGGCGCTGTTGCGCGCGAGCGAACCCGCGCGCGCGCTTTCAGAGGGAGCGCGATGATGATC        | 6199 |
| Epi-d1-repeatB     | 6100 | GCATGGGCGGATCAGCGGGTGGCTTATGGCGGTGGGCGCTGTTGCGCGCGAGCGAACCCGCGCGCGCGCTTTCAGAGGGAGCGCGATGATGATC        | 6199 |
| Nipponbare-repeatC | 6100 | GCATGGGCGGATCAGCGGGTGGCTTATGGCGGTGGGCGCTGTTGCGCGCGAGCGAACCCGCGCGCGCGCTTTCAGAGGGAGCGCGATGATGATC        | 6199 |
| Epi-d1-repeatC     | 6100 | GCATGGGCGGATCAGCGGGTGGCTTATGGCGGTGGGCGCTGTTGCGCGCGAGCGAACCCGCGCGCGCGCTTTCAGAGGGAGCGCGATGATGATC        | 6199 |
| Nipponbare-repeata | 6186 | CTGGATAAATTTGAGACTTCCGGGCGCGCGTGGTGGTGAAGAAAGCCATACATATTTACGCGCAACTGTACGCGCAAAAGCAAGTTTTTAAAGTACCATG  | 6285 |
| Epi-d1-repeata     | 6187 | CTGGATAAATTTGAGACTTCCGGGCGCGCGTGGTGGTGAAGAAAGCCATACATATTTACGCGCAACTGTACGCGCAAAAGCAAGTTTTTAAAGTACCATG  | 6286 |
| Nipponbare-repeatB | 6200 | CTGGATAAATTTGAGACTTCCGGGCGCGCGTGGTGGTGAAGAAAGCCATACATATTTACGCGCAACTGTACGCGCAAAAGCAAGTTTTTAAAGTACCATG  | 6299 |
| Epi-d1-repeatB     | 6200 | CTGGATAAATTTGAGACTTCCGGGCGCGCGTGGTGGTGAAGAAAGCCATACATATTTACGCGCAACTGTACGCGCAAAAGCAAGTTTTTAAAGTACCATG  | 6299 |
| Nipponbare-repeatC | 6200 | CTGGATAAATTTGAGACTTCCGGGCGCGCGTGGTGGTGAAGAAAGCCATACATATTTACGCGCAACTGTACGCGCAAAAGCAAGTTTTTAAAGTACCATG  | 6299 |
| Epi-d1-repeatC     | 6200 | CTGGATAAATTTGAGACTTCCGGGCGCGCGTGGTGGTGAAGAAAGCCATACATATTTACGCGCAACTGTACGCGCAAAAGCAAGTTTTTAAAGTACCATG  | 6299 |
| Nipponbare-repeata | 6286 | AAAACTATGACGACTGACACCGCATAAAGAGACGACGCTGCTGCTGCGAGCTCGGTGGCTGAGCTTGTATACCCAGCTGCGGGGGGGG              | 6383 |
| Epi-d1-repeata     | 6287 | AAAACTATGACGACTGACACCGCATAAAGAGACGACGCTGCTGCTGCGAGCTCGGTGGCTGAGCTTGTATACCCAGCTGCGGGGGGGG              | 6384 |
| Nipponbare-repeatB | 6300 | AAAACTATGACGACTGACACCGCATAAAGAGACGACGCTGCTGCTGCGAGCTCGGTGGCTGAGCTTGTATACCCAGCTGCGGGGGGGG              | 6399 |
| Epi-d1-repeatB     | 6300 | AAAACTATGACGACTGACACCGCATAAAGAGACGACGCTGCTGCTGCGAGCTCGGTGGCTGAGCTTGTATACCCAGCTGCGGGGGGGG              | 6399 |
| Nipponbare-repeatC | 6300 | AAAACTATGACGACTGACACCGCATAAAGAGACGACGCTGCTGCTGCGAGCTCGGTGGCTGAGCTTGTATACCCAGCTGCGGGGGGGG              | 6397 |
| Epi-d1-repeatC     | 6300 | AAAACTATGACGACTGACACCGCATAAAGAGACGACGCTGCTGCTGCGAGCTCGGTGGCTGAGCTTGTATACCCAGCTGCGGGGGGGG              | 6397 |
| Nipponbare-repeata | 6384 | -----CGGAGTTGGCATGTTTCGCGCTGCTGGAGAAATGAGGTTTCTCCCTCGATGGAATATGGATGCAAACTCTCCCGACTTTGGCCCAAC          | 6472 |
| Epi-d1-repeata     | 6385 | -----CGGAGTTGGCATGTTTCGCGCTGCTGGAGAAATGAGGTTTCTCCCTCGATGGAATATGGATGCAAACTCTCCCGACTTTGGCCCAAC          | 6473 |
| Nipponbare-repeatB | 6400 | GGGGGGGGGGGGCGGAGTTGGCATGTTTCGCGCTGCTGGAGAAATGAGGTTTCTCCCTCGATGGAATATGGATGCAAACTCTCCCGACTTTGGCCCAAC   | 6499 |
| Epi-d1-repeatB     | 6400 | GGGGGGGGGGGGCGGAGTTGGCATGTTTCGCGCTGCTGGAGAAATGAGGTTTCTCCCTCGATGGAATATGGATGCAAACTCTCCCGACTTTGGCCCAAC   | 6497 |
| Nipponbare-repeatC | 6398 | -----CGGAGTTGGCATGTTTCGCGCTGCTGGAGAAATGAGGTTTCTCCCTCGATGGAATATGGATGCAAACTCTCCCGACTTTGGCCCAAC          | 6486 |
| Epi-d1-repeatC     | 6398 | -----CGGAGTTGGCATGTTTCGCGCTGCTGGAGAAATGAGGTTTCTCCCTCGATGGAATATGGATGCAAACTCTCCCGACTTTGGCCCAAC          | 6486 |
| Nipponbare-repeata | 6473 | SAGGAGGGAAGGTGTGAGTCACTCCCTGGGCTCTTGAAGCGCTGCTCATGGAGCGAAGAGGAGCGTGAATCTGGGAGAGGTGTGTGTTGGCGGGTGGCCCG | 6572 |
| Epi-d1-repeata     | 6474 | SAGGAGGGAAGGTGTGAGTCACTCCCTGGGCTCTTGAAGCGCTGCTCATGGAGCGAAGAGGAGCGTGAATCTGGGAGAGGTGTGTGTTGGCGGGTGGCCCG | 6573 |
| Nipponbare-repeatB | 6500 | SAGGAGGGAAGGTGTGAGTCACTCCCTGGGCTCTTGAAGCGCTGCTCATGGAGCGAAGAGGAGCGTGAATCTGGGAGAGGTGTGTGTTGGCGGGTGGCCCG | 6599 |
| Epi-d1-repeatB     | 6498 | SAGGAGGGAAGGTGTGAGTCACTCCCTGGGCTCTTGAAGCGCTGCTCATGGAGCGAAGAGGAGCGTGAATCTGGGAGAGGTGTGTGTTGGCGGGTGGCCCG | 6597 |
| Nipponbare-repeatC | 6487 | SAGGAGGGAAGGTGTGAGTCACTCCCTGGGCTCTTGAAGCGCTGCTCATGGAGCGAAGAGGAGCGTGAATCTGGGAGAGGTGTGTGTTGGCGGGTGGCCCG | 6586 |
| Epi-d1-repeatC     | 6487 | SAGGAGGGAAGGTGTGAGTCACTCCCTGGGCTCTTGAAGCGCTGCTCATGGAGCGAAGAGGAGCGTGAATCTGGGAGAGGTGTGTGTTGGCGGGTGGCCCG | 6586 |
| Nipponbare-repeata | 6573 | ACGACGCGCGCTGGCGATGCTGTGGGAGAGAGCGAGCACTTGTATGTGGAAGAGGAGCGTGAATCTGGGAGAGGTGTGTGTTGGCGGGTGGCCCGACGAC  | 6672 |
| Epi-d1-repeata     | 6574 | ACGACGCGCGCTGGCGATGCTGTGGGAGAGAGCGAGCACTTGTATGTGGAAGAGGAGCGTGAATCTGGGAGAGGTGTGTGTTGGCGGGTGGCCCGACGAC  | 6673 |
| Nipponbare-repeatB | 6600 | ACGACGCGCGCTGGCGATGCTGTGGGAGAGAGCGAGCACTTGTATGTGGAAGAGGAGCGTGAATCTGGGAGAGGTGTGTGTTGGCGGGTGGCCCGACGAC  | 6643 |
| Epi-d1-repeatB     | 6598 | ACGACGCGCGCTGGCGATGCTGTGGGAGAGAGCGAGCACTTGTATGTGGAAGAGGAGCGTGAATCTGGGAGAGGTGTGTGTTGGCGGGTGGCCCGACGAC  | 6641 |
| Nipponbare-repeatC | 6587 | ACGACGCGCGCTGGCGATGCTGTGGGAGAGAGCGAGCACTTGTATGTGGAAGAGGAGCGTGAATCTGGGAGAGGTGTGTGTTGGCGGGTGGCCCGACGAC  | 6686 |
| Epi-d1-repeatC     | 6587 | ACGACGCGCGCTGGCGATGCTGTGGGAGAGAGCGAGCACTTGTATGTGGAAGAGGAGCGTGAATCTGGGAGAGGTGTGTGTTGGCGGGTGGCCCGACGAC  | 6686 |
| Nipponbare-repeata | 6673 | CGCGCTGGCGATGGGTGGGGAGAGGCGAGCACTTGTATGTGGGACCGTGCCACACCCCGACAGTGCBCAAGTCCATGACGTGAGCGCTCCCGGTCAT     | 6772 |
| Epi-d1-repeata     | 6674 | CGCGCTGGCGATGGGTGGGGAGAGGCGAGCACTTGTATGTGGGACCGTGCCACACCCCGACAGTGCBCAAGTCCATGACGTGAGCGCTCCCGGTCAT     | 6773 |
| Nipponbare-repeatB | 6644 | -----TTTGGGACCGTGCCACACCCCGACAGTGCBCAAGTCCATGACGTGAGCGCTCCCGGTCAT                                     | 6705 |
| Epi-d1-repeatB     | 6642 | -----TTTGGGACCGTGCCACACCCCGACAGTGCBCAAGTCCATGACGTGAGCGCTCCCGGTCAT                                     | 6703 |
| Nipponbare-repeatC | 6687 | CGCGCTGGCGATGGGTGGGGAGAGGCGAGCACTTGTATGTGGGACCGTGCCACACCCCGACAGTGCBCAAGTCCATGACGTGAGCGCTCCCGGTCAT     | 6783 |
| Epi-d1-repeatC     | 6687 | CGCGCTGGCGATGGGTGGGGAGAGGCGAGCACTTGTATGTGGGACCGTGCCACACCCCGACAGTGCBCAAGTCCATGACGTGAGCGCTCCCGGTCAT     | 6783 |
| Nipponbare-repeata | 6773 | TAGGAGCCACGTGACGTGGCGCTCCCGCGTTTGAAGTTTTCCCTGCGCAACCGACACCTTTCTCCCAACCATTTGGCGAATGCCCTAGAGGTTTGGGTTG  | 6872 |
| Epi-d1-repeata     | 6774 | TAGGAGCCACGTGACGTGGCGCTCCCGCGTTTGAAGTTTTCCCTGCGCAACCGACACCTTTCTCCCAACCATTTGGCGAATGCCCTAGAGGTTTGGGTTG  | 6873 |
| Nipponbare-repeatB | 6706 | TAGGAGCCACGTGACGTGGCGCTCCCGCGTTTGAAGTTTTCCCTGCGCAACCGACACCTTTCTCCCAACCATTTGGCGAATGCCCTAGAGGTTTGGGTTG  | 6805 |
| Epi-d1-repeatB     | 6704 | TAGGAGCCACGTGACGTGGCGCTCCCGCGTTTGAAGTTTTCCCTGCGCAACCGACACCTTTCTCCCAACCATTTGGCGAATGCCCTAGAGGTTTGGGTTG  | 6803 |
| Nipponbare-repeatC | 6784 | TAGGAGCCACGTGACGTGGCGCTCCCGCGTTTGAAGTTTTCCCTGCGCAACCGACACCTTTCTCCCAACCATTTGGCGAATGCCCTAGAGGTTTGGGTTG  | 6883 |
| Epi-d1-repeatC     | 6784 | TAGGAGCCACGTGACGTGGCGCTCCCGCGTTTGAAGTTTTCCCTGCGCAACCGACACCTTTCTCCCAACCATTTGGCGAATGCCCTAGAGGTTTGGGTTG  | 6883 |
| Nipponbare-repeata | 6873 | AGATAGGAGTAGAGGGGAGTAGGTGGAAGAGAGTTGCTAGTTGGCTGTGGGTTCCACGTGGGCGCTGCACTGACTCAGCAACCACTCAACAAACCG      | 6972 |
| Epi-d1-repeata     | 6874 | AGATAGGAGTAGAGGGGAGTAGGTGGAAGAGAGTTGCTAGTTGGCTGTGGGTTCCACGTGGGCGCTGCACTGACTCAGCAACCACTCAACAAACCG      | 6973 |
| Nipponbare-repeatB | 6806 | AGATAGGAGTAGAGGGGAGTAGGTGGAAGAGAGTTGCTAGTTGGCTGTGGGTTCCACGTGGGCGCTGCACTGACTCAGCAACCACTCAACAAACCG      | 6905 |
| Epi-d1-repeatB     | 6804 | AGATAGGAGTAGAGGGGAGTAGGTGGAAGAGAGTTGCTAGTTGGCTGTGGGTTCCACGTGGGCGCTGCACTGACTCAGCAACCACTCAACAAACCG      | 6903 |
| Nipponbare-repeatC | 6884 | AGATAGGAGTAGAGGGGAGTAGGTGGAAGAGAGTTGCTAGTTGGCTGTGGGTTCCACGTGGGCGCTGCACTGACTCAGCAACCACTCAACAAACCG      | 6983 |
| Epi-d1-repeatC     | 6884 | AGATAGGAGTAGAGGGGAGTAGGTGGAAGAGAGTTGCTAGTTGGCTGTGGGTTCCACGTGGGCGCTGCACTGACTCAGCAACCACTCAACAAACCG      | 6983 |

Fig. S2 continued.

**Fig. S2 continued.**

[illegible]

**Fig. S2 continued.**

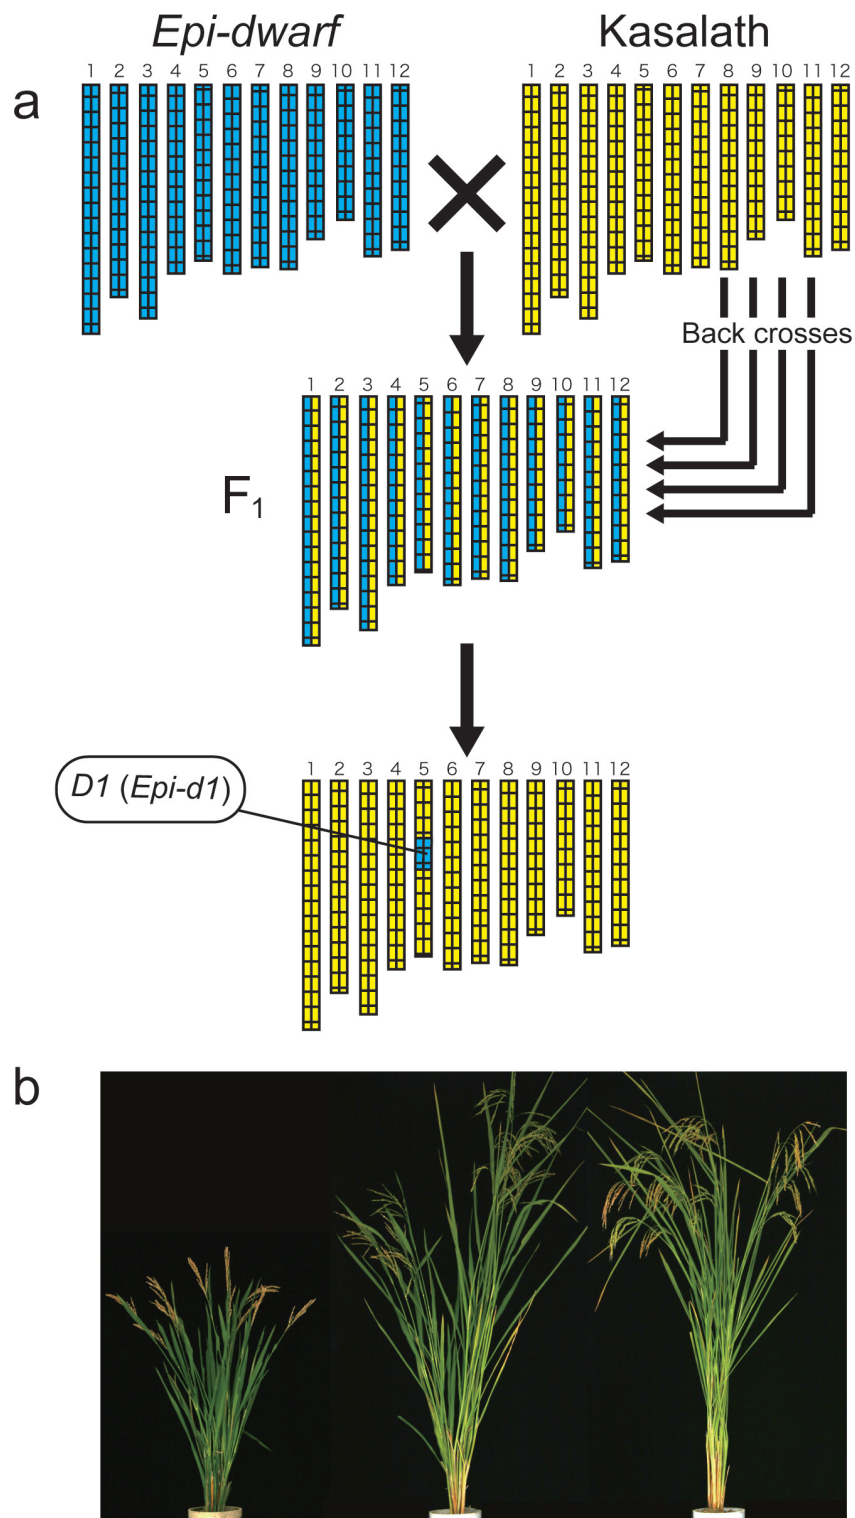

**Fig. S3.** Construction and gross morphologies of nearly isogenic line (NIL) of *Epi-d1*. The chromosomes of *Epi-d1* and *Kasalath* are shown as blue and yellow bars, respectively. (a) NIL carries *D1* locus from *Epi-d1* in *Kasalath* genome background. (b) NIL-*Epi-d1* shows dwarf (Left), chimeric (Center), and normal (Right) phenotypes.

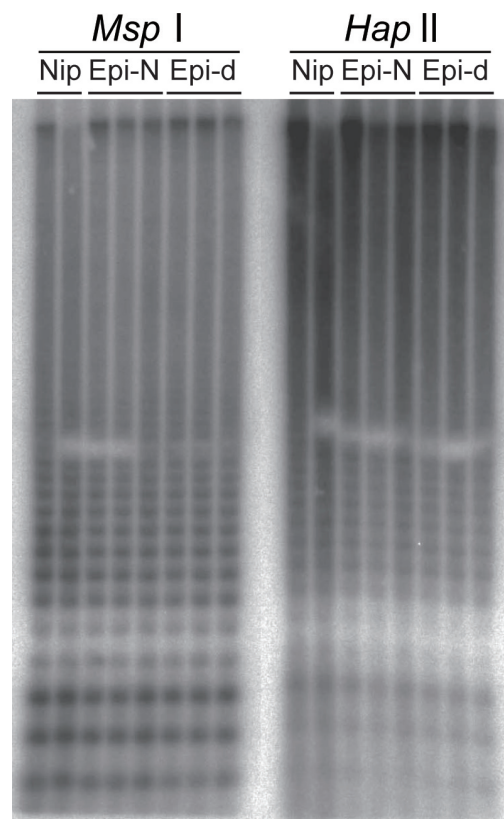

**Fig. S4.** DNA methylation analysis of 168-bp centromere specific repeat. The genomic DNA extracted from Nipponbare (Nip), *Epi-normal* (Epi-N), and *Epi-dwarf* (Epi-d) were digested by DNA methylation insensitive restriction enzyme, *Msp*I or DNA methylation-sensitive restriction enzyme *Hap*II. Digested DNAs were hybridized with 168-bp centromere-specific repeat probe.

**Table S1. Segregation of chimeric plant**

| Four independent chimeric plants | Seed source    | Phenotype of progenies |                       |                     | Total |
|----------------------------------|----------------|------------------------|-----------------------|---------------------|-------|
|                                  |                | Normal, <i>n</i> (%)   | Chimera, <i>n</i> (%) | Dwarf, <i>n</i> (%) |       |
| Plant 1                          | Normal tillers | 44 (23.5)              | 127 (67.9)            | 16 (8.5)            | 187   |
|                                  | Dwarf tillers  | 3 (2.8)                | 44 (41.5)             | 59 (55.7)           | 106   |
| Plant 2                          | Normal tillers | 59 (22.9)              | 149 (57.6)            | 50 (19.4)           | 258   |
|                                  | Dwarf tillers  | 21 (23.1)              | 60 (65.9)             | 10 (11.0)           | 91    |
| Plant 3                          | Normal tillers | 86 (43.0)              | 66 (33.0)             | 48 (24.0)           | 200   |
|                                  | Dwarf tillers  | 2 (1.1)                | 93 (51.7)             | 85 (47.2)           | 180   |
| Plant 4                          | Normal tillers | 47 (31.3)              | 55 (36.7)             | 48 (32.0)           | 150   |
|                                  | Dwarf tillers  | 0 (0.0)                | 69 (53.1)             | 61 (46.9)           | 130   |

Table S2. Phenotypic inversion in progenies of normal or dwarf plants of *Epi-d1*

| Seed source               | Phenotype of progenies |         |         | Total  |
|---------------------------|------------------------|---------|---------|--------|
|                           | Normal                 | Chimera | Dwarf   |        |
| <i>Epi-normal</i> plant 1 | 2,480                  | 220     | 175     | 2,875  |
| <i>Epi-normal</i> plant 2 | 2,631                  | 315     | 26      | 2,972  |
| <i>Epi-normal</i> plant 3 | 2,064                  | 501     | 143     | 2,708  |
| <i>Epi-normal</i> plant 4 | 2,831                  | 49      | 174     | 3,054  |
| Total                     | 10,006                 | 1,085   | 518     | 11,609 |
|                           | (86.2%)                | (9.3%)  | (4.5%)  | (100%) |
| <i>Epi-dwarf</i> plant 5  | 12                     | 713     | 2,033   | 2,758  |
| <i>Epi-dwarf</i> plant 6  | 43                     | 809     | 2,042   | 2,894  |
| <i>Epi-dwarf</i> plant 7  | 31                     | 672     | 2,229   | 2,932  |
| <i>Epi-dwarf</i> plant 8  | 4                      | 744     | 1,708   | 2,456  |
| Total                     | 90                     | 2,938   | 8,012   | 11,040 |
|                           | (0.8%)                 | (26.6%) | (72.6%) | (100%) |

Table S3. Crossing experiment for allelic interaction

| Combination                          | Segregation in F <sub>2</sub> |       |         | Total | $\chi^2$ 3:1(N:D) | <i>P</i>  |
|--------------------------------------|-------------------------------|-------|---------|-------|-------------------|-----------|
|                                      | Normal                        | Dwarf | Chimera |       |                   |           |
| <i>Epi-dwarf</i> / <i>Epi-normal</i> | 383                           | 134   | 3       | 520   | 0.233             | 0.50–0.70 |
| <i>Epi-normal</i> / <i>Epi-dwarf</i> | 259                           | 102   | 0       | 361   | 2.040             | 0.10–0.30 |
| <i>Epi-dwarf</i> /IR24               | 47                            | 15    | 0       | 62    | 0.022             | 0.70–0.90 |
| IR24/ <i>Epi-dwarf</i>               | 224                           | 71    | 3       | 298   | 0.137             | 0.70–0.90 |
| <i>Epi-dwarf</i> /Taichung 65        | 260                           | 88    | 0       | 348   | 0.015             | 0.90–0.99 |
| Taichung 65/ <i>Epi-dwarf</i>        | 318                           | 94    | 5       | 417   | 1.049             | 0.30–0.50 |

Table S4. Allelism test between *Epi-d1* and *d1* mutant

| Seed source                  | Phenotype of F <sub>1</sub> plants |           |              | Total         |
|------------------------------|------------------------------------|-----------|--------------|---------------|
|                              | Normal                             | Chimera   | Dwarf        |               |
| <i>Epi-dwarf</i> / <i>d1</i> | 0<br>(0%)                          | 6<br>(4%) | 144<br>(96%) | 150<br>(100%) |
